# Supplementary material for: p38 MAP Kinase Signaling in Microglia Plays a Sex-Specific Protective Role in CNS Autoimmunity and Regulates Microglial Transcriptional States
Source: Front Immunol. 2021 Oct 11;12:715311. doi: 10.3389/fimmu.2021.715311 (PMC8542909; doi:10.3389/fimmu.2021.715311)
Supplement: Supplementary file 3 [file DataSheet_3.xlsx]

## Sheet: All clusters
cluster	gene	p_val_adj	p_val	avg_logFC	pct.1	pct.2
DAM1	Spp1	1	0.000612579	0.886974	0.635	0.656
DAM1	Apoe	2.42184e-09	7.79905e-14	0.675024	0.907	0.874
DAM1	Cxcl9	1	0.000540033	0.551322	0.248	0.388
DAM1	Cst7	0.000933144	3.005e-08	0.377501	0.82	0.795
DAM1	Cd74	0.00204396	6.58216e-08	0.335489	0.969	0.922
DAM1	Ftl1	1.4683e-22	4.72836e-27	0.31981	0.994	0.974
DAM1	H2-Ab1	0.569361	1.83351e-05	0.318657	0.904	0.844
DAM1	H2-Aa	1	3.77286e-05	0.313655	0.848	0.815
DAM1	Ctsd	1.5419e-09	4.96539e-14	0.309042	1	0.993
DAM1	Cd9	1.41432e-11	4.55455e-16	0.30059	0.972	0.927
DAM1	Cd63	2.53298e-19	8.15694e-24	0.300041	0.988	0.931
DAM1	Ctsb	2.96369e-15	9.54396e-20	0.289384	1	0.989
DAM1	H2-Eb1	1	0.000377524	0.277892	0.817	0.789
DAM1	Lamp1	9.94103e-16	3.20131e-20	0.270313	0.981	0.942
DAM1	Ctsl	1.07463e-09	3.46062e-14	0.249382	0.994	0.947
DAM1	Timp2	0.0739057	2.37999e-06	0.247767	0.96	0.92
DAM1	B2m	3.13966e-22	1.01107e-26	0.235461	1	0.986
DAM1	Rps26	3.0355e-19	9.77522e-24	0.234001	0.994	0.938
DAM1	H2-D1	1.33432e-16	4.29693e-21	0.233956	1	0.992
DAM1	Trem2	1.5625e-05	5.03172e-10	0.233715	0.981	0.918
DAM1	Ctss	1.84331e-14	5.93602e-19	0.233697	1	0.988
DAM1	Fth1	5.97627e-05	1.92454e-09	0.231103	1	0.981
DAM1	Eef1a1	9.16978e-21	2.95294e-25	0.228764	1	0.992
DAM1	Gpr84	1	0.00039919	0.22749	0.833	0.816
DAM1	Ctsz	3.31247e-14	1.06671e-18	0.227365	1	0.971
DAM1	Eif3f	7.70171e-09	2.48018e-13	0.221123	0.941	0.882
DAM1	Pld3	1	0.00683369	0.219843	0.721	0.761
DAM1	H2-K1	8.79201e-17	2.83129e-21	0.219374	1	0.991
DAM1	Cstb	3.92539e-05	1.26409e-09	0.217958	0.858	0.809
DAM1	Cxcl16	1	0.00440655	0.217676	0.793	0.815
DAM1	Akr1a1	6.68869e-09	2.15396e-13	0.213658	0.954	0.901
DAM1	Npc2	1.45497e-14	4.68543e-19	0.213137	1	0.95
DAM1	H2-Q7	0.000441285	1.42107e-08	0.211747	0.981	0.926
DAM1	Rpl17	1.09781e-13	3.53529e-18	0.209627	0.991	0.941
DAM1	Rpl26	1.15971e-15	3.7346e-20	0.20765	0.991	0.945
DAM1	Rpl10	2.08326e-14	6.70874e-19	0.204345	0.991	0.95
DAM1	Rps27	3.88486e-16	1.25104e-20	0.203139	0.997	0.954
DAM1	Cyba	1.42975e-08	4.60421e-13	0.200406	0.991	0.956
DAM3	Ercc5	7.31017e-27	2.35409e-31	0.278278	0.723	0.315
DAM3	Naaa	5.52432e-19	1.779e-23	0.2517	0.993	0.808
DAM3	Ccl4	1.32057e-17	4.25264e-22	0.247305	0.977	0.761
DAM3	Mcm6	8.08549e-22	2.60377e-26	0.24722	0.799	0.414
DAM3	Cx3cr1	5.3909e-18	1.73603e-22	0.238088	1	0.927
DAM3	B930036N10Rik	5.14347e-18	1.65635e-22	0.234898	0.792	0.433
DAM3	Fcgr4	3.34363e-15	1.07675e-19	0.233611	0.987	0.823
DAM3	Sparc	1.12615e-15	3.62653e-20	0.231409	1	0.94
DAM3	Ly86	2.31845e-19	7.46611e-24	0.217927	1	0.976
DAM3	Tmem173	1.38024e-14	4.44478e-19	0.216331	0.99	0.837
DAM3	P4hb	1.58867e-13	5.11599e-18	0.214412	0.987	0.847
DAM3	Ccl2	2.97849e-11	9.59163e-16	0.213637	0.993	0.882
DAM3	Tnf	6.47186e-13	2.08413e-17	0.211557	0.974	0.729
DAM2	Cd74	6.81536e-37	2.19475e-41	0.611168	1	0.921
DAM2	H2-Aa	4.17211e-33	1.34355e-37	0.595968	0.977	0.799
DAM2	Apoe	6.41224e-23	2.06493e-27	0.5532	0.986	0.865
DAM2	H2-Eb1	7.81911e-32	2.51799e-36	0.538381	0.977	0.767
DAM2	Spp1	4.34947e-20	1.40066e-24	0.522714	0.867	0.62
DAM2	H2-Ab1	6.23911e-29	2.00918e-33	0.487116	0.982	0.836
DAM2	Ccl5	2.35465e-25	7.58269e-30	0.457387	0.821	0.496
DAM2	Saa3	2.57635e-21	8.29661e-26	0.413037	0.45	0.162
DAM2	Cxcl9	2.90165e-13	9.34417e-18	0.36508	0.615	0.324
DAM2	C4b	2.73334e-16	8.80217e-21	0.3047	0.991	0.761
DAM2	Cst7	8.69444e-18	2.79987e-22	0.300488	0.986	0.772
DAM2	Pld3	6.28639e-17	2.02441e-21	0.292974	0.954	0.724
DAM2	Ctsb	1.44332e-27	4.64791e-32	0.281654	1	0.99
DAM2	Nfkbia	4.59556e-11	1.47991e-15	0.271558	1	0.885
DAM2	Trem2	1.93291e-16	6.22454e-21	0.271232	0.995	0.921
DAM2	Gpr84	3.15161e-12	1.01491e-16	0.265626	0.972	0.796
DAM2	Fn1	1.39556e-08	4.49412e-13	0.263879	0.885	0.681
DAM2	Lpl	7.46703e-20	2.40461e-24	0.256762	0.725	0.398
DAM2	Lgals3bp	1.66133e-17	5.34998e-22	0.250016	1	0.939
DAM2	H2-Oa	4.48487e-20	1.44426e-24	0.245192	0.872	0.554
DAM2	Ctsa	3.05865e-15	9.84976e-20	0.229067	1	0.923
DAM2	Apoc1	2.38086e-16	7.6671e-21	0.228397	0.546	0.259
DAM2	Ctsd	1.22691e-15	3.951e-20	0.225779	1	0.994
DAM2	Cd9	1.5332e-11	4.93736e-16	0.222073	0.995	0.927
DAM2	Ier3	6.81961e-10	2.19612e-14	0.220107	0.968	0.714
DAM2	Lag3	5.12325e-11	1.64984e-15	0.217441	0.963	0.772
DAM2	Csf1	1.94786e-11	6.27269e-16	0.216546	0.885	0.611
DAM2	Lamp1	3.31738e-17	1.0683e-21	0.212891	1	0.942
DAM2	Ifit3	0.000730869	2.35362e-08	0.212191	0.739	0.499
DAM2	Ifit1	0.000145419	4.68294e-09	0.208466	0.578	0.356
DAM2	Tlr2	7.75887e-09	2.49859e-13	0.205841	0.972	0.8
DAM2	Man2b1	7.46753e-13	2.40477e-17	0.202086	1	0.951
DAM2	Timp2	1.17164e-07	3.77303e-12	0.201618	1	0.917
pMG1	Hist1h2ap	1.7838e-64	5.74438e-69	1.27089	0.962	0.56
pMG1	Top2a	9.17176e-91	2.95358e-95	1.00133	0.995	0.44
pMG1	Hist1h2ae	8.01035e-74	2.57957e-78	0.945247	0.9	0.328
pMG1	Mki67	2.26066e-86	7.27999e-91	0.888926	0.981	0.395
pMG1	Ube2c	2.285e-66	7.35838e-71	0.843678	0.909	0.377
pMG1	Stmn1	3.21978e-62	1.03687e-66	0.803746	0.986	0.63
pMG1	Hmgb2	6.69515e-67	2.15604e-71	0.779231	1	0.866
pMG1	Pclaf	7.25153e-78	2.33521e-82	0.75392	0.952	0.363
pMG1	H2afx	2.06026e-71	6.63465e-76	0.742574	0.967	0.463
pMG1	Birc5	6.10713e-75	1.96668e-79	0.685545	0.962	0.366
pMG1	Smc4	2.25428e-74	7.25944e-79	0.670544	0.971	0.44
pMG1	Hist1h1b	1.78103e-102	5.73544e-107	0.669439	0.809	0.158
pMG1	Tubb4b	6.50591e-44	2.0951e-48	0.65871	0.976	0.666
pMG1	Tubb5	2.87978e-61	9.27377e-66	0.638009	0.995	0.887
pMG1	Nusap1	2.82638e-110	9.10181e-115	0.636279	0.914	0.215
pMG1	Tuba1b	9.97764e-60	3.2131e-64	0.632704	0.995	0.891
pMG1	Cenpa	7.52398e-60	2.42295e-64	0.604184	0.957	0.425
pMG1	Smc2	8.29159e-71	2.67014e-75	0.598841	0.962	0.424
pMG1	Cdk1	7.18023e-71	2.31225e-75	0.594356	0.914	0.369
pMG1	Cdca8	1.44538e-78	4.65457e-83	0.587368	0.952	0.345
pMG1	H2afz	2.26848e-48	7.30519e-53	0.579652	1	0.906
pMG1	Arl6ip1	4.23281e-40	1.36309e-44	0.579515	0.995	0.883
pMG1	Prc1	1.13209e-98	3.64566e-103	0.577263	0.904	0.225
pMG1	Tpx2	2.59874e-83	8.36873e-88	0.570563	0.904	0.291
pMG1	Ube2s	4.97898e-49	1.60338e-53	0.550365	0.99	0.736
pMG1	Cenpf	7.65604e-73	2.46548e-77	0.531539	0.909	0.296
pMG1	Cks2	1.41323e-52	4.55103e-57	0.524522	0.943	0.499
pMG1	Pbk	4.11641e-98	1.32561e-102	0.52079	0.876	0.21
pMG1	Tmpo	1.9888e-50	6.40453e-55	0.518525	0.976	0.652
pMG1	Hmmr	1.33482e-89	4.29851e-94	0.515574	0.852	0.208
pMG1	Ccnb1	2.53576e-77	8.16591e-82	0.495713	0.842	0.237
pMG1	Cks1b	2.78996e-50	8.9845e-55	0.492655	0.933	0.457
pMG1	Incenp	1.37846e-67	4.43904e-72	0.490349	0.914	0.355
pMG1	Cenpe	9.07851e-64	2.92355e-68	0.487175	0.852	0.287
pMG1	Hist1h4d	1.3893e-46	4.47397e-51	0.48638	0.837	0.326
pMG1	Ccna2	1.02327e-75	3.29525e-80	0.480435	0.837	0.242
pMG1	Tuba1c	2.14299e-36	6.90108e-41	0.476266	0.943	0.603
pMG1	Cdca3	2.12162e-68	6.83224e-73	0.467546	0.895	0.315
pMG1	Plk1	6.16566e-91	1.98553e-95	0.464008	0.828	0.187
pMG1	Rrm2	5.83827e-53	1.8801e-57	0.463312	0.727	0.218
pMG1	Spc24	2.18383e-63	7.0326e-68	0.453703	0.88	0.322
pMG1	Aurkb	2.71805e-83	8.75295e-88	0.452902	0.88	0.245
pMG1	Dek	4.73342e-36	1.5243e-40	0.450856	0.99	0.794
pMG1	Racgap1	2.3784e-68	7.65918e-73	0.444909	0.9	0.311
pMG1	H2afv	3.11057e-43	1.0017e-47	0.44019	0.957	0.556
pMG1	Nucks1	2.27975e-36	7.34147e-41	0.431688	0.976	0.682
pMG1	Ezh2	9.10075e-59	2.93071e-63	0.418964	0.919	0.37
pMG1	Cxcl10	2.9046e-10	9.3537e-15	0.415406	0.914	0.645
pMG1	Fbxo5	5.41178e-85	1.74276e-89	0.410042	0.842	0.215
pMG1	Kif23	1.86899e-94	6.01872e-99	0.408152	0.89	0.22
pMG1	Hmgb1	6.1779e-34	1.98947e-38	0.40498	0.99	0.881
pMG1	Rrm1	7.85642e-52	2.53e-56	0.404034	0.876	0.357
pMG1	Tagln2	1.65773e-35	5.33838e-40	0.402356	0.981	0.728
pMG1	Tyms	1.99655e-51	6.4295e-56	0.39981	0.89	0.376
pMG1	Ccnb2	1.34989e-45	4.34706e-50	0.398943	0.837	0.332
pMG1	Ckap2l	3.27413e-71	1.05437e-75	0.398741	0.866	0.264
pMG1	Aurka	3.96641e-82	1.2773e-86	0.393455	0.746	0.162
pMG1	Rangap1	6.74574e-47	2.17233e-51	0.390064	0.919	0.451
pMG1	Spc25	3.49267e-85	1.12475e-89	0.389759	0.799	0.183
pMG1	Tacc3	6.1215e-67	1.97131e-71	0.381812	0.895	0.308
pMG1	Kif20b	1.43043e-72	4.60642e-77	0.381608	0.813	0.217
pMG1	Knl1	2.38376e-83	7.67643e-88	0.377374	0.837	0.21
pMG1	Ran	3.04024e-27	9.79048e-32	0.362872	0.986	0.822
pMG1	Jpt1	1.84743e-24	5.94929e-29	0.354761	0.986	0.782
pMG1	Anp32b	2.60914e-28	8.40221e-33	0.354213	0.986	0.813
pMG1	Ccl2	9.15178e-09	2.94715e-13	0.349007	1	0.888
pMG1	Kif11	1.52661e-77	4.91616e-82	0.347098	0.775	0.181
pMG1	Rad51ap1	2.63598e-64	8.48865e-69	0.34382	0.775	0.224
pMG1	Hist1h1e	8.58733e-35	2.76538e-39	0.343079	0.823	0.395
pMG1	Hmgn2	3.53971e-27	1.13989e-31	0.338555	0.971	0.695
pMG1	Ptma	1.1418e-34	3.67693e-39	0.337361	1	0.968
pMG1	Hirip3	5.71585e-43	1.84068e-47	0.336903	0.818	0.345
pMG1	Dbf4	1.2869e-49	4.14422e-54	0.335804	0.866	0.359
pMG1	Hjurp	5.43958e-47	1.75171e-51	0.334889	0.914	0.443
pMG1	Selenoh	1.86837e-27	6.01671e-32	0.334659	0.967	0.641
pMG1	Bub1b	8.02556e-65	2.58447e-69	0.332204	0.794	0.233
pMG1	Reep4	8.77223e-32	2.82492e-36	0.330822	0.847	0.42
pMG1	Cdc20	9.88047e-51	3.18181e-55	0.330364	0.761	0.239
pMG1	Ncapd2	2.22196e-61	7.15539e-66	0.329349	0.813	0.261
pMG1	Mis18bp1	9.94236e-82	3.20174e-86	0.328868	0.799	0.186
pMG1	Sgo1	8.35949e-77	2.69201e-81	0.326834	0.813	0.202
pMG1	Kif22	3.75881e-74	1.21045e-78	0.325655	0.751	0.175
pMG1	Lmnb1	3.88448e-36	1.25092e-40	0.324133	0.971	0.566
pMG1	Cdkn2d	2.68612e-32	8.65012e-37	0.323897	0.88	0.461
pMG1	Smc1a	2.93182e-21	9.44135e-26	0.323472	0.947	0.674
pMG1	Kif15	1.98574e-74	6.39468e-79	0.322908	0.852	0.243
pMG1	Cdkn3	2.66087e-47	8.56881e-52	0.321608	0.751	0.258
pMG1	Tk1	4.31059e-46	1.38814e-50	0.321359	0.799	0.293
pMG1	Rad21	5.68171e-35	1.82968e-39	0.320126	0.885	0.471
pMG1	Atad2	1.05606e-26	3.40082e-31	0.319759	0.895	0.534
pMG1	Hsp90aa1	3.22755e-23	1.03937e-27	0.317068	0.995	0.884
pMG1	Shcbp1	1.69354e-81	5.4537e-86	0.316273	0.804	0.186
pMG1	Calm2	3.20828e-21	1.03316e-25	0.315191	1	0.937
pMG1	Knstrn	5.46395e-52	1.75956e-56	0.312695	0.809	0.287
pMG1	Esco2	1.31263e-69	4.22706e-74	0.3076	0.636	0.129
pMG1	Ranbp1	9.71145e-21	3.12738e-25	0.306871	0.976	0.77
pMG1	Ccdc34	3.4942e-35	1.12524e-39	0.306257	0.9	0.459
pMG1	Ndc80	5.33522e-75	1.7181e-79	0.301391	0.742	0.174
pMG1	Hnrnpab	1.76335e-18	5.67852e-23	0.299997	0.986	0.777
pMG1	Cdca2	9.8207e-68	3.16256e-72	0.299482	0.708	0.167
pMG1	Uhrf1	1.02017e-43	3.28527e-48	0.29905	0.789	0.299
pMG1	Shmt2	4.39765e-27	1.41618e-31	0.293983	0.861	0.484
pMG1	Clspn	1.12797e-45	3.63239e-50	0.291921	0.684	0.218
pMG1	Cit	1.98443e-69	6.39047e-74	0.290227	0.804	0.226
pMG1	Ccnf	1.01071e-78	3.25479e-83	0.28932	0.694	0.138
pMG1	Cdkn2c	9.81024e-51	3.15919e-55	0.28842	0.746	0.234
pMG1	Cbx3	2.35497e-16	7.58373e-21	0.287983	0.952	0.714
pMG1	Sae1	2.5034e-29	8.0617e-34	0.284917	0.9	0.492
pMG1	Ncaph	3.94647e-62	1.27088e-66	0.28325	0.77	0.225
pMG1	Fen1	5.25869e-29	1.69346e-33	0.281609	0.871	0.442
pMG1	Ckap5	6.22032e-42	2.00313e-46	0.276477	0.833	0.359
pMG1	Pnp	6.42988e-17	2.07062e-21	0.269084	1	0.854
pMG1	Bub3	1.08768e-18	3.50266e-23	0.268429	0.947	0.674
pMG1	Snrpd1	5.21726e-17	1.68011e-21	0.267402	0.947	0.699
pMG1	Mcm7	3.62615e-25	1.16773e-29	0.266315	0.785	0.394
pMG1	Smc6	7.31066e-21	2.35425e-25	0.263429	0.928	0.601
pMG1	Nuf2	6.63107e-61	2.13541e-65	0.26006	0.694	0.172
pMG1	Nudc	2.39405e-18	7.70958e-23	0.259397	0.933	0.688
pMG1	Smchd1	1.69274e-22	5.45112e-27	0.259114	0.962	0.688
pMG1	Gas2l3	1.0784e-37	3.47279e-42	0.258426	0.722	0.28
pMG1	Prdx4	5.3112e-14	1.71037e-18	0.257746	0.971	0.73
pMG1	Cbx5	6.04064e-29	1.94527e-33	0.254691	0.9	0.489
pMG1	Usp1	2.06055e-28	6.63559e-33	0.254419	0.823	0.417
pMG1	Gmnn	1.50008e-36	4.83072e-41	0.251722	0.828	0.362
pMG1	Set	2.52763e-15	8.13971e-20	0.251633	0.986	0.856
pMG1	Isg15	4.50328e-08	1.45019e-12	0.24969	0.928	0.75
pMG1	Exosc8	7.63045e-23	2.45723e-27	0.249067	0.928	0.583
pMG1	Asf1b	4.88411e-44	1.57283e-48	0.248972	0.713	0.243
pMG1	Mcm3	2.03396e-18	6.54997e-23	0.248931	0.861	0.505
pMG1	Anln	3.45576e-68	1.11286e-72	0.24759	0.684	0.153
pMG1	Kifc1	7.83985e-75	2.52467e-79	0.247298	0.641	0.118
pMG1	Banf1	4.01459e-18	1.29282e-22	0.247181	0.943	0.665
pMG1	Ccl12	0.000300141	9.66543e-09	0.24657	0.976	0.858
pMG1	Lsm2	4.85032e-21	1.56195e-25	0.246443	0.89	0.527
pMG1	Kif20a	2.29928e-60	7.40439e-65	0.246153	0.646	0.148
pMG1	Ssrp1	3.98738e-20	1.28405e-24	0.245839	0.933	0.599
pMG1	Psat1	9.03701e-18	2.91019e-22	0.245455	0.856	0.498
pMG1	Ncapg	1.90967e-78	6.14973e-83	0.244987	0.703	0.134
pMG1	Slc43a3	4.72571e-41	1.52182e-45	0.244517	0.804	0.328
pMG1	Stil	1.25537e-70	4.04267e-75	0.243957	0.694	0.15
pMG1	Actn4	1.09908e-15	3.53938e-20	0.242972	0.885	0.563
pMG1	Hist2h2ac	7.24183e-47	2.33209e-51	0.241191	0.632	0.173
pMG1	Nrm	7.65249e-34	2.46433e-38	0.240681	0.77	0.332
pMG1	Hint1	1.92775e-13	6.20795e-18	0.240194	0.995	0.868
pMG1	Hdgf	5.08869e-14	1.63871e-18	0.239989	0.933	0.677
pMG1	Pmf1	8.98426e-30	2.8932e-34	0.239983	0.847	0.409
pMG1	Ppia	3.14092e-18	1.01147e-22	0.239375	1	0.952
pMG1	Hist1h3c	1.03961e-74	3.34787e-79	0.23931	0.565	0.084
pMG1	Mb21d1	2.81915e-20	9.07851e-25	0.239067	0.914	0.543
pMG1	Pcna	1.70582e-14	5.49326e-19	0.238993	0.847	0.542
pMG1	Hmgn1	7.46081e-14	2.40261e-18	0.236222	0.971	0.775
pMG1	Nap1l1	7.24635e-13	2.33354e-17	0.235397	0.967	0.713
pMG1	Snrpb	1.64209e-14	5.28804e-19	0.234455	0.967	0.809
pMG1	Ckap2	1.88071e-57	6.05647e-62	0.230657	0.641	0.154
pMG1	Aspm	1.61136e-58	5.18908e-63	0.229234	0.584	0.118
pMG1	Sgo2a	1.83476e-76	5.90847e-81	0.229036	0.646	0.119
pMG1	Troap	1.54801e-55	4.98506e-60	0.228527	0.584	0.131
pMG1	Bora	7.83776e-55	2.52399e-59	0.227975	0.665	0.18
pMG1	Lig1	9.3599e-19	3.01417e-23	0.2279	0.761	0.401
pMG1	E2f8	9.46797e-49	3.04897e-53	0.227015	0.545	0.125
pMG1	Mad2l1	2.70467e-52	8.70985e-57	0.226658	0.727	0.22
pMG1	Kif4	1.22369e-61	3.94065e-66	0.226532	0.656	0.153
pMG1	Hat1	1.34249e-17	4.32321e-22	0.225785	0.813	0.488
pMG1	Nop58	4.21206e-13	1.35641e-17	0.22533	0.919	0.616
pMG1	Bub1	3.07969e-64	9.91753e-69	0.225016	0.675	0.149
pMG1	Slc29a1	2.70981e-18	8.7264e-23	0.224373	0.861	0.485
pMG1	Lmf2	3.8151e-28	1.22858e-32	0.223523	0.823	0.403
pMG1	Kpna2	1.09247e-42	3.51808e-47	0.222938	0.603	0.17
pMG1	Fam111a	1.31415e-13	4.23197e-18	0.22286	0.957	0.662
pMG1	Cdk4	9.90028e-15	3.18819e-19	0.222588	0.947	0.659
pMG1	Dut	1.41354e-23	4.55203e-28	0.222204	0.761	0.381
pMG1	Tmem109	1.81991e-14	5.86065e-19	0.218681	0.866	0.575
pMG1	Pimreg	1.27844e-50	4.11697e-55	0.21789	0.608	0.152
pMG1	AC160336.1	6.0489e-11	1.94793e-15	0.216338	0.967	0.811
pMG1	Ndc1	1.80818e-47	5.8229e-52	0.216216	0.732	0.236
pMG1	Ncapg2	4.62784e-39	1.4903e-43	0.216083	0.651	0.21
pMG1	Rdx	3.71766e-09	1.1972e-13	0.215598	0.938	0.683
pMG1	Mthfd2	5.83089e-13	1.87772e-17	0.215202	0.876	0.582
pMG1	Arhgef39	3.35287e-72	1.07972e-76	0.21413	0.598	0.103
pMG1	Ubald2	1.19333e-12	3.84288e-17	0.212648	0.938	0.649
pMG1	Lsm5	1.53107e-15	4.93051e-20	0.209893	0.89	0.564
pMG1	Tnf	2.15883e-05	6.95209e-10	0.208982	0.962	0.746
pMG1	Dlgap5	5.97682e-56	1.92472e-60	0.208633	0.684	0.183
pMG1	Cenpw	6.84541e-29	2.20443e-33	0.208149	0.703	0.297
pMG1	Vrk1	2.02086e-22	6.50776e-27	0.20814	0.9	0.518
pMG1	Lbr	4.39452e-34	1.41517e-38	0.207691	0.828	0.351
pMG1	Anapc5	6.32386e-14	2.03647e-18	0.207683	0.943	0.684
pMG1	Tcf19	1.53666e-25	4.94851e-30	0.206172	0.565	0.214
pMG1	Cdkn1a	2.70555e-09	8.71268e-14	0.206113	0.785	0.483
pMG1	Hist1h2ab	8.55458e-59	2.75483e-63	0.205074	0.474	0.073
pMG1	Anp32e	6.73832e-16	2.16994e-20	0.204243	0.914	0.599
pMG1	Ccne1	5.72488e-25	1.84358e-29	0.203581	0.531	0.19
pMG1	Nsd2	5.00401e-19	1.61144e-23	0.203158	0.909	0.605
pMG1	Lockd	3.72986e-49	1.20113e-53	0.202792	0.636	0.167
pMG1	H3f3b	1.42077e-14	4.57531e-19	0.202611	1	0.987
pMG1	Tipin	3.14399e-22	1.01246e-26	0.202116	0.756	0.387
pMG1	G3bp1	1.61684e-10	5.20671e-15	0.201762	0.981	0.753
pMG1	Cenpm	2.63004e-35	8.46953e-40	0.200752	0.641	0.224
hMG1	Fos	1.98753e-39	6.40045e-44	1.63791	0.96	0.798
hMG1	Btg2	7.60167e-49	2.44797e-53	1.55036	0.987	0.823
hMG1	Jun	1.16191e-55	3.74171e-60	1.48674	1	0.888
hMG1	Dusp1	2.0235e-37	6.51626e-42	1.48017	0.921	0.707
hMG1	Fosb	1.45076e-27	4.67187e-32	1.4126	0.808	0.539
hMG1	Jund	1.56186e-40	5.02964e-45	1.39537	1	0.86
hMG1	Egr1	2.25004e-45	7.24581e-50	1.3694	0.96	0.754
hMG1	Klf4	1.39675e-18	4.49797e-23	1.13762	0.689	0.472
hMG1	Zfp36	5.55564e-42	1.78908e-46	1.10347	0.974	0.836
hMG1	Klf2	1.95193e-26	6.28579e-31	1.10181	0.934	0.822
hMG1	Junb	1.2958e-38	4.17287e-43	1.09205	0.993	0.901
hMG1	Atf3	1.12534e-34	3.62393e-39	1.04083	0.974	0.701
hMG1	Adamts1	0.000906005	2.91761e-08	0.997514	0.523	0.426
hMG1	Rhob	5.96675e-48	1.92147e-52	0.934281	1	0.897
hMG1	Neat1	5.04354e-28	1.62417e-32	0.913662	0.907	0.676
hMG1	Zfp36l1	4.491e-25	1.44624e-29	0.901868	0.947	0.828
hMG1	Tmx4	2.44711e-13	7.88041e-18	0.896207	0.775	0.65
hMG1	Rgs1	7.50155e-17	2.41572e-21	0.895201	0.874	0.686
hMG1	Rgs2	1.10894e-34	3.57112e-39	0.858162	0.96	0.838
hMG1	Cst3	8.84072e-43	2.84698e-47	0.843455	1	0.984
hMG1	Klf6	2.14457e-30	6.90615e-35	0.831272	0.987	0.884
hMG1	Ccl4	8.2823e-05	2.66715e-09	0.812698	0.841	0.796
hMG1	Ccl3	7.06521e-15	2.27521e-19	0.806862	0.901	0.784
hMG1	Btg1	5.99065e-34	1.92917e-38	0.802073	1	0.944
hMG1	Dusp6	4.25249e-20	1.36943e-24	0.786175	0.841	0.715
hMG1	Socs3	2.53467e-30	8.1624e-35	0.743996	0.967	0.829
hMG1	Sgk1	1.36887e-17	4.40817e-22	0.742696	0.881	0.744
hMG1	Ier5	4.15829e-36	1.3391e-40	0.736232	0.98	0.839
hMG1	Ubc	3.45084e-44	1.11127e-48	0.733529	1	0.982
hMG1	Tmem176a	1.74259e-21	5.61168e-26	0.725552	0.868	0.685
hMG1	Cx3cr1	8.44128e-30	2.71835e-34	0.724711	1	0.934
hMG1	Ier2	7.02092e-27	2.26095e-31	0.722703	0.94	0.788
hMG1	Nfkbiz	7.45517e-19	2.40079e-23	0.713734	0.868	0.691
hMG1	B930036N10Rik	1.25747e-13	4.04942e-18	0.705553	0.715	0.476
hMG1	Cebpa	2.1948e-20	7.06792e-25	0.700806	0.874	0.727
hMG1	Glul	3.77132e-21	1.21448e-25	0.694341	0.907	0.792
hMG1	P2ry12	6.99776e-29	2.25349e-33	0.670271	0.974	0.853
hMG1	Tmem176b	2.48971e-21	8.0176e-26	0.666336	0.934	0.761
hMG1	Id2	2.8441e-08	9.15885e-13	0.660455	0.801	0.757
hMG1	Gpr34	3.27478e-22	1.05458e-26	0.657912	0.874	0.723
hMG1	Ccl12	2.39304e-08	7.70631e-13	0.643722	0.947	0.865
hMG1	Tsc22d3	3.46671e-12	1.11639e-16	0.626879	0.728	0.596
hMG1	Ddx5	6.34426e-43	2.04304e-47	0.599561	1	0.988
hMG1	Srsf5	5.53508e-36	1.78246e-40	0.599135	0.993	0.91
hMG1	Vsir	2.76613e-25	8.90777e-30	0.59766	0.98	0.883
hMG1	Mcl1	8.84272e-29	2.84762e-33	0.593703	0.993	0.925
hMG1	Pnrc1	6.37377e-28	2.05254e-32	0.586227	0.96	0.799
hMG1	Siglech	9.75099e-26	3.14011e-30	0.574506	0.993	0.874
hMG1	Kctd12	1.24652e-27	4.01416e-32	0.572604	0.974	0.884
hMG1	H3f3b	8.40312e-20	2.70606e-24	0.560476	1	0.988
hMG1	Malat1	6.29234e-24	2.02632e-28	0.546637	1	0.945
hMG1	Egr3	9.29182e-12	2.99225e-16	0.54434	0.523	0.297
hMG1	Mafb	7.77779e-22	2.50468e-26	0.543369	0.993	0.942
hMG1	Adgrg1	7.90112e-15	2.5444e-19	0.539975	0.781	0.68
hMG1	Smad7	1.57675e-27	5.0776e-32	0.539213	0.967	0.804
hMG1	Clk1	1.25029e-19	4.02632e-24	0.527477	0.934	0.836
hMG1	Ppp1r10	1.54924e-13	4.98902e-18	0.523583	0.742	0.571
hMG1	Selplg	4.62973e-25	1.49091e-29	0.520481	1	0.955
hMG1	Kdm6b	7.17943e-13	2.31199e-17	0.518628	0.715	0.539
hMG1	Gm26532	5.97766e-07	1.92499e-11	0.511656	0.497	0.334
hMG1	Cd14	4.73305e-17	1.52419e-21	0.509403	0.894	0.781
hMG1	Ccnl1	5.10147e-25	1.64283e-29	0.507303	0.987	0.873
hMG1	Ccl2	4.58886e-05	1.47775e-09	0.500205	0.94	0.898
hMG1	Txnip	1.46908e-10	4.73089e-15	0.4994	0.828	0.758
hMG1	Cfh	9.46283e-19	3.04732e-23	0.492413	0.907	0.787
hMG1	Adrb2	1.57306e-15	5.06574e-20	0.491439	0.662	0.432
hMG1	Serinc3	1.10969e-28	3.57352e-33	0.483314	1	0.951
hMG1	Fcrls	3.83124e-10	1.23378e-14	0.479378	0.927	0.833
hMG1	Selenop	1.04685e-19	3.37119e-24	0.471126	0.987	0.871
hMG1	Tmcc3	3.48422e-17	1.12202e-21	0.469842	0.848	0.675
hMG1	F11r	2.01303e-23	6.48255e-28	0.465377	0.954	0.827
hMG1	Il1a	3.11303e-09	1.00249e-13	0.463138	0.841	0.696
hMG1	Arf4	6.51893e-18	2.09929e-22	0.455754	0.967	0.881
hMG1	Dnajb1	3.21683e-08	1.03592e-12	0.450521	0.669	0.549
hMG1	Ltc4s	3.21187e-11	1.03432e-15	0.44528	0.815	0.676
hMG1	Rhoh	4.45404e-20	1.43433e-24	0.445033	0.94	0.822
hMG1	Ccr5	5.30062e-15	1.70696e-19	0.443991	0.96	0.859
hMG1	Tmem119	3.78743e-22	1.21967e-26	0.439024	0.993	0.92
hMG1	Zfp36l2	6.26449e-15	2.01736e-19	0.432356	0.947	0.846
hMG1	Srgap2	4.88212e-16	1.57219e-20	0.432094	0.934	0.794
hMG1	Il6ra	1.91686e-14	6.17288e-19	0.43009	0.801	0.664
hMG1	Ppp1r15a	1.93215e-16	6.22211e-21	0.427847	0.894	0.73
hMG1	Wsb1	9.45722e-15	3.04551e-19	0.424342	0.887	0.77
hMG1	Jmjd1c	2.74024e-13	8.82441e-18	0.42374	0.921	0.795
hMG1	Mef2a	3.44097e-18	1.10809e-22	0.423231	0.974	0.883
hMG1	Skil	3.53389e-15	1.13802e-19	0.421587	0.921	0.805
hMG1	Ifngr1	4.37675e-19	1.40945e-23	0.418692	0.947	0.833
hMG1	Pik3r1	6.52406e-11	2.10095e-15	0.416754	0.861	0.794
hMG1	Tanc2	1.03342e-14	3.32794e-19	0.416613	0.901	0.763
hMG1	Dock10	3.62919e-13	1.16871e-17	0.413652	0.861	0.699
hMG1	Hpgd	5.17526e-09	1.66659e-13	0.411185	0.583	0.4
hMG1	Maf	0.000183277	5.90207e-09	0.410922	0.728	0.668
hMG1	Mertk	4.43123e-15	1.42699e-19	0.408326	0.954	0.834
hMG1	Csmd3	7.69632e-15	2.47845e-19	0.406043	0.536	0.265
hMG1	Il10ra	1.05544e-15	3.39883e-20	0.404098	0.894	0.773
hMG1	Zfand5	2.33502e-09	7.51945e-14	0.3984	0.841	0.759
hMG1	Hspa5	7.15057e-13	2.3027e-17	0.396425	0.993	0.97
hMG1	Nav2	1.03902e-11	3.34595e-16	0.393387	0.748	0.598
hMG1	Cirbp	1.28692e-07	4.14428e-12	0.392879	0.695	0.585
hMG1	Slc15a3	8.8701e-11	2.85644e-15	0.391433	0.967	0.884
hMG1	Pdgfb	1.07123e-08	3.4497e-13	0.390781	0.821	0.696
hMG1	Tra2b	3.23927e-17	1.04314e-21	0.390126	0.993	0.916
hMG1	Herpud1	1.67031e-09	5.37889e-14	0.381962	0.834	0.742
hMG1	Ctsf	9.83203e-05	3.16621e-09	0.380845	0.742	0.661
hMG1	Sparc	1.13685e-20	3.66101e-25	0.379032	1	0.945
hMG1	Rlim	2.60202e-10	8.37928e-15	0.376465	0.768	0.661
hMG1	Serpine2	6.34255e-08	2.04249e-12	0.376068	0.755	0.653
hMG1	Golm1	8.84885e-13	2.8496e-17	0.372505	0.94	0.86
hMG1	Frmd4a	6.39767e-16	2.06024e-20	0.370907	0.947	0.82
hMG1	Nrip1	5.15502e-13	1.66007e-17	0.370465	0.881	0.762
hMG1	Arhgap5	1.89868e-10	6.11432e-15	0.370147	0.894	0.794
hMG1	Atf4	2.90237e-11	9.34651e-16	0.369062	0.927	0.819
hMG1	AC149090.1	1.88004e-11	6.05431e-16	0.368771	0.974	0.85
hMG1	Ddx3x	0.000103288	3.32619e-09	0.367654	0.828	0.784
hMG1	Olfml3	7.81079e-15	2.51531e-19	0.36301	1	0.94
hMG1	P2ry13	3.94629e-11	1.27083e-15	0.362219	0.874	0.772
hMG1	Runx1	3.14928e-13	1.01416e-17	0.361314	0.96	0.833
hMG1	Brd2	4.63265e-07	1.49185e-11	0.356402	0.881	0.833
hMG1	Ssh2	2.47843e-13	7.98129e-18	0.355159	0.94	0.822
hMG1	Pou2f2	1.24599e-08	4.01245e-13	0.352446	0.927	0.842
hMG1	Slco2b1	3.76516e-12	1.2125e-16	0.349148	0.967	0.864
hMG1	Trf	6.08179e-09	1.95852e-13	0.34888	0.934	0.868
hMG1	Ccdc86	3.53692e-09	1.13899e-13	0.347277	0.934	0.848
hMG1	Gm26802	7.92385e-50	2.55172e-54	0.345406	0.252	0.013
hMG1	Epc1	4.64929e-08	1.49721e-12	0.344581	0.682	0.57
hMG1	Trmt10a	6.14325e-05	1.97831e-09	0.344421	0.603	0.498
hMG1	Abca9	1.1711e-13	3.7713e-18	0.343947	0.517	0.27
hMG1	Cttnbp2nl	4.35234e-10	1.40158e-14	0.343167	0.868	0.762
hMG1	Crybb1	0.135982	4.37903e-06	0.340456	0.788	0.704
hMG1	D830025C05Rik	7.37072e-08	2.37359e-12	0.339609	0.47	0.273
hMG1	Gm3448	5.07258e-08	1.63352e-12	0.338372	0.503	0.307
hMG1	Cd53	9.02234e-12	2.90546e-16	0.337524	0.967	0.889
hMG1	Egr2	1.83165e-05	5.89845e-10	0.336002	0.358	0.186
hMG1	Dnajb9	9.38944e-10	3.02368e-14	0.329484	0.689	0.535
hMG1	Adap2	6.73657e-09	2.16938e-13	0.329297	0.887	0.745
hMG1	Unc93b1	1.88066e-19	6.05628e-24	0.328326	1	0.957
hMG1	Impact	0.00270791	8.72028e-08	0.326959	0.563	0.47
hMG1	Camk2n1	4.08641e-05	1.31595e-09	0.32622	0.642	0.576
hMG1	Nav3	3.321e-13	1.06946e-17	0.325221	0.927	0.796
hMG1	Klk8	0.00100538	3.23762e-08	0.324607	0.583	0.503
hMG1	Tra2a	2.18607e-10	7.03979e-15	0.323286	0.927	0.833
hMG1	Nfkbia	4.42857e-06	1.42613e-10	0.323137	0.98	0.892
hMG1	Marcks	3.30109e-15	1.06305e-19	0.3168	1	0.955
hMG1	Tox4	4.11602e-09	1.32548e-13	0.316375	0.881	0.753
hMG1	Hpgds	5.49382e-11	1.76918e-15	0.315837	0.934	0.868
hMG1	Tpst2	2.13761e-08	6.88374e-13	0.315173	0.861	0.767
hMG1	Csf1r	6.55741e-21	2.11168e-25	0.315047	1	0.975
hMG1	Rasgrp3	0.000119968	3.86334e-09	0.315001	0.649	0.575
hMG1	Gtf2h2	0.000265243	8.54162e-09	0.314974	0.748	0.681
hMG1	Slc2a5	0.00497328	1.60154e-07	0.31305	0.556	0.478
hMG1	Tm6sf1	5.51516e-07	1.77605e-11	0.312873	0.695	0.615
hMG1	Bin2	1.69474e-08	5.45758e-13	0.312844	0.934	0.876
hMG1	Hexb	7.42203e-24	2.39012e-28	0.312248	1	0.985
hMG1	Itga6	2.37482e-06	7.64762e-11	0.312171	0.914	0.817
hMG1	Plxdc2	1.98531e-07	6.39329e-12	0.311895	0.954	0.86
hMG1	Col27a1	0.00621206	2.00047e-07	0.309894	0.536	0.455
hMG1	Dnajb4	3.65453e-05	1.17687e-09	0.307494	0.51	0.366
hMG1	Evi2a	1.85331e-09	5.96822e-14	0.307153	0.901	0.781
hMG1	Epb41l2	9.58306e-10	3.08603e-14	0.304984	0.974	0.909
hMG1	Fam105a	9.40529e-10	3.02878e-14	0.304347	0.927	0.82
hMG1	Odc1	0.0127377	4.10194e-07	0.303829	0.662	0.622
hMG1	Picalm	1.95475e-10	6.2949e-15	0.30241	0.974	0.912
hMG1	Rtn4rl1	2.47112e-05	7.95774e-10	0.30164	0.662	0.579
hMG1	Cyth4	2.8406e-10	9.14759e-15	0.301494	0.96	0.914
hMG1	Ncf2	4.36191e-06	1.40467e-10	0.300772	0.887	0.84
hMG1	Ivns1abp	7.85966e-11	2.53105e-15	0.298901	0.901	0.821
hMG1	St3gal6	2.12793e-05	6.85258e-10	0.298877	0.728	0.661
hMG1	St3gal5	3.72841e-06	1.20066e-10	0.298738	0.662	0.551
hMG1	Scoc	1.81009e-05	5.82904e-10	0.296315	0.841	0.776
hMG1	Jmjd6	0.000157183	5.06177e-09	0.295207	0.616	0.517
hMG1	Mat2a	3.1706e-05	1.02103e-09	0.295038	0.861	0.785
hMG1	Apbb1ip	5.11886e-08	1.64843e-12	0.29457	0.954	0.897
hMG1	Wdr44	0.00110143	3.54693e-08	0.293588	0.55	0.432
hMG1	Gm26669	5.73135e-07	1.84567e-11	0.29335	0.411	0.205
hMG1	5031425E22Rik	1.64506e-06	5.29759e-11	0.2928	0.596	0.448
hMG1	Scamp2	2.3797e-07	7.66336e-12	0.29207	0.967	0.887
hMG1	Lpcat2	6.25859e-09	2.01545e-13	0.291974	0.993	0.937
hMG1	Pla2g15	7.37523e-05	2.37505e-09	0.290531	0.848	0.785
hMG1	Tuba1a	0.0556373	1.79169e-06	0.290278	0.695	0.632
hMG1	Marcksl1	1	0.00241052	0.289903	0.576	0.565
hMG1	Zfhx3	1.35838e-07	4.37439e-12	0.289089	0.94	0.858
hMG1	Mtdh	6.05236e-07	1.94904e-11	0.288452	0.96	0.872
hMG1	Gpr183	0.403902	1.30069e-05	0.288039	0.55	0.499
hMG1	Arhgap17	3.07762e-08	9.91085e-13	0.287772	0.881	0.768
hMG1	Rel	4.25061e-07	1.36882e-11	0.28762	0.755	0.628
hMG1	Slc29a3	1.85846e-06	5.98481e-11	0.286096	0.921	0.829
hMG1	Tgfbr1	8.94955e-06	2.88203e-10	0.285906	0.874	0.816
hMG1	Bhlhe41	5.05459e-05	1.62773e-09	0.285853	0.881	0.818
hMG1	Rbm39	2.94536e-19	9.48493e-24	0.285627	1	0.966
hMG1	Sirpa	2.31763e-10	7.46348e-15	0.284517	0.98	0.904
hMG1	Cebpd	0.0215554	6.94148e-07	0.283214	0.656	0.603
hMG1	Neurl3	1	4.58884e-05	0.28281	0.523	0.48
hMG1	2020-03-01	0.0286119	9.2139e-07	0.281851	0.728	0.658
hMG1	Trem2	9.6706e-08	3.11423e-12	0.279927	0.987	0.925
hMG1	Mef2c	2.50736e-06	8.07446e-11	0.279892	0.993	0.923
hMG1	Fgd4	6.57258e-05	2.11657e-09	0.27957	0.55	0.375
hMG1	Lrba	0.0371359	1.19589e-06	0.279215	0.49	0.389
hMG1	Tnfaip3	0.000706788	2.27607e-08	0.277788	0.682	0.582
hMG1	Ywhaz	2.65104e-05	8.53716e-10	0.277647	0.894	0.853
hMG1	Cmtm6	3.67766e-05	1.18432e-09	0.276868	0.815	0.775
hMG1	Gt(ROSA)26Sor	0.115902	3.73238e-06	0.273882	0.536	0.452
hMG1	Pid1	1.83857e-05	5.92075e-10	0.273827	0.596	0.444
hMG1	Saraf	2.61348e-06	8.41619e-11	0.27272	0.894	0.829
hMG1	Plekho1	7.1421e-06	2.29997e-10	0.27272	0.914	0.845
hMG1	Rnase4	1.67136e-06	5.38229e-11	0.272333	0.934	0.818
hMG1	Ptpro	0.0989374	3.18608e-06	0.270778	0.543	0.464
hMG1	Frmd4b	1.23279e-06	3.96996e-11	0.270763	0.821	0.7
hMG1	Nfia	0.333831	1.07504e-05	0.269401	0.603	0.561
hMG1	Rab3il1	0.000173932	5.60113e-09	0.268831	0.907	0.822
hMG1	Cxxc5	6.11145e-05	1.96807e-09	0.267977	0.709	0.639
hMG1	Nfam1	9.15402e-06	2.94787e-10	0.267764	0.735	0.648
hMG1	Hk2	2.00869e-06	6.4686e-11	0.267405	0.974	0.911
hMG1	Slc16a6	1.5586e-06	5.01915e-11	0.26733	0.821	0.692
hMG1	Gm10138	0.00584703	1.88292e-07	0.26699	0.51	0.401
hMG1	2900060B14Rik	7.70548e-06	2.4814e-10	0.266689	0.391	0.202
hMG1	Fam46a	0.0117384	3.78012e-07	0.266286	0.828	0.701
hMG1	Osm	1	0.00165987	0.265732	0.589	0.532
hMG1	Taf7	1.59991e-05	5.15218e-10	0.265534	0.649	0.509
hMG1	Lifr	1	0.000142716	0.264426	0.517	0.457
hMG1	Csnk1e	2.47106e-05	7.95757e-10	0.264046	0.834	0.718
hMG1	Mylip	0.0055803	1.79703e-07	0.261186	0.742	0.681
hMG1	Trim47	1	0.000439744	0.260951	0.45	0.415
hMG1	Eif4a2	1.02326e-08	3.29521e-13	0.260807	0.907	0.793
hMG1	Numb	0.0274599	8.84292e-07	0.260633	0.636	0.571
hMG1	Blnk	0.00301555	9.71097e-08	0.260432	0.762	0.701
hMG1	Lgals8	0.00456466	1.46996e-07	0.260127	0.636	0.562
hMG1	Ikzf1	2.87704e-08	9.26495e-13	0.260104	0.94	0.798
hMG1	Snx29	2.0697e-07	6.66507e-12	0.25796	0.596	0.412
hMG1	Lag3	0.00280907	9.04603e-08	0.257018	0.887	0.788
hMG1	Ctsl	2.38556e-07	7.68222e-12	0.255871	1	0.951
hMG1	Adap2os	7.23014e-07	2.32832e-11	0.255552	0.576	0.391
hMG1	Atp8a2	0.00500404	1.61145e-07	0.254213	0.483	0.361
hMG1	Rbpms	1	0.000624376	0.252823	0.636	0.583
hMG1	Nktr	4.98086e-07	1.60399e-11	0.252728	0.927	0.827
hMG1	Luc7l2	4.8636e-11	1.56623e-15	0.252192	0.98	0.907
hMG1	Sowahc	0.051375	1.65443e-06	0.251989	0.589	0.523
hMG1	Rapgef5	9.99302e-05	3.21805e-09	0.251758	0.669	0.558
hMG1	Wwc2	0.00713557	2.29787e-07	0.250553	0.623	0.537
hMG1	A930007I19Rik	0.188637	6.07467e-06	0.250528	0.517	0.407
hMG1	Hps4	3.43119e-05	1.10495e-09	0.249335	0.815	0.728
hMG1	Zcchc6	1.84265e-06	5.93388e-11	0.249166	0.868	0.794
hMG1	Pcf11	0.000313577	1.00981e-08	0.248598	0.662	0.564
hMG1	Sat1	0.000933297	3.0055e-08	0.248583	0.974	0.957
hMG1	Gpr146	3.88452e-05	1.25093e-09	0.248408	0.695	0.583
hMG1	Tns1	0.0269907	8.69182e-07	0.248333	0.57	0.47
hMG1	Wdr37	0.00107641	3.46636e-08	0.248197	0.57	0.437
hMG1	Ly86	1.04581e-07	3.36781e-12	0.248186	1	0.979
hMG1	Gm26778	0.00535731	1.72522e-07	0.247642	0.563	0.428
hMG1	Hook3	1	0.000377205	0.247442	0.636	0.633
hMG1	Laptm5	1.11437e-11	3.5886e-16	0.247062	1	0.974
hMG1	Calm2	0.0595094	1.91638e-06	0.246785	0.974	0.942
hMG1	Purb	1	7.58479e-05	0.24659	0.728	0.712
hMG1	Tgfbr2	0.00072041	2.31994e-08	0.245827	0.927	0.855
hMG1	Ophn1	1.92569e-08	6.20131e-13	0.245811	0.881	0.761
hMG1	Il6st	0.160555	5.17034e-06	0.243711	0.649	0.606
hMG1	C5ar2	0.00653369	2.10404e-07	0.243538	0.556	0.448
hMG1	Lair1	1.4498e-08	4.6688e-13	0.243089	0.993	0.945
hMG1	Abi3	0.000576759	1.85734e-08	0.242513	0.907	0.815
hMG1	Fam102b	0.00073708	2.37362e-08	0.242361	0.742	0.657
hMG1	Csf3r	0.00259143	8.34518e-08	0.241794	0.834	0.751
hMG1	Pag1	3.4436e-06	1.10894e-10	0.241539	0.887	0.795
hMG1	Zkscan3	0.0867115	2.79237e-06	0.241316	0.596	0.525
hMG1	Ttc28	0.396133	1.27567e-05	0.241088	0.675	0.616
hMG1	Ctss	9.97797e-07	3.21321e-11	0.238395	1	0.99
hMG1	Tubb2a	1	0.000138728	0.237851	0.556	0.545
hMG1	Kcnq1ot1	0.958125	3.08545e-05	0.23743	0.669	0.583
hMG1	Tpm3	1.58229e-06	5.09545e-11	0.236964	0.947	0.916
hMG1	Sf3b1	3.67304e-06	1.18283e-10	0.235673	0.967	0.909
hMG1	Chd2	0.00314125	1.01158e-07	0.235236	0.702	0.609
hMG1	Tigd2	1	0.000528894	0.235205	0.583	0.533
hMG1	4933433G15Rik	5.47063e-11	1.76171e-15	0.233798	0.377	0.146
hMG1	Cebpz	0.000276271	8.89675e-09	0.233546	0.881	0.809
hMG1	Rsrc2	0.000532498	1.7148e-08	0.232771	0.901	0.823
hMG1	Git2	9.6405e-08	3.10453e-12	0.232528	0.914	0.796
hMG1	Sft2d1	0.00103406	3.33e-08	0.232519	0.815	0.76
hMG1	Fbrsl1	0.00143456	4.61972e-08	0.232402	0.715	0.649
hMG1	Clec4a2	0.00480983	1.54891e-07	0.232108	0.457	0.317
hMG1	Ythdc1	0.00535181	1.72344e-07	0.232076	0.788	0.733
hMG1	Zfx	0.215697	6.94608e-06	0.23135	0.543	0.446
hMG1	Foxn3	6.41585e-06	2.0661e-10	0.230946	0.828	0.744
hMG1	Sox4	1	0.00184766	0.230872	0.344	0.267
hMG1	Tmem173	0.0322788	1.03947e-06	0.230434	0.94	0.857
hMG1	Hnrnpdl	0.0154311	4.96929e-07	0.230204	0.881	0.829
hMG1	Gm10382	6.452e-05	2.07774e-09	0.230173	0.391	0.219
hMG1	Nipbl	0.446696	1.43849e-05	0.229926	0.795	0.721
hMG1	Cd37	3.9739e-05	1.27972e-09	0.229891	0.94	0.913
hMG1	1700017B05Rik	6.62759e-05	2.13428e-09	0.229781	0.801	0.686
hMG1	Usp2	0.28727	9.25097e-06	0.229674	0.768	0.722
hMG1	Wdr45b	0.00472341	1.52108e-07	0.229398	0.715	0.668
hMG1	Gpr155	0.034546	1.11249e-06	0.22924	0.536	0.437
hMG1	Sall3	0.0320004	1.03051e-06	0.229237	0.742	0.668
hMG1	Ccnl2	0.000708821	2.28262e-08	0.229009	0.801	0.699
hMG1	Rnf13	0.0033492	1.07854e-07	0.227757	0.775	0.735
hMG1	Pros1	4.6593e-05	1.50043e-09	0.226983	0.854	0.788
hMG1	Pld4	1.53518e-05	4.94373e-10	0.22608	1	0.953
hMG1	Tcf7l2	0.0897099	2.88893e-06	0.225817	0.517	0.407
hMG1	Pde3b	0.000332448	1.07058e-08	0.225396	0.821	0.758
hMG1	Rtn4	8.34034e-05	2.68584e-09	0.225333	0.921	0.859
hMG1	Pura	1	4.37185e-05	0.225231	0.722	0.714
hMG1	Cmtm7	0.00015903	5.12125e-09	0.224559	0.914	0.869
hMG1	Lysmd3	0.165847	5.34076e-06	0.224378	0.517	0.423
hMG1	Cd300c2	0.0016679	5.37114e-08	0.224267	0.947	0.871
hMG1	Ep300	0.000294348	9.47889e-09	0.223615	0.728	0.642
hMG1	Ypel3	5.77488e-06	1.85969e-10	0.221792	0.861	0.705
hMG1	Ecscr	0.0596673	1.92147e-06	0.221537	0.649	0.589
hMG1	Prpf38b	0.0178233	5.73963e-07	0.221285	0.914	0.814
hMG1	Tifa	1	0.000196933	0.22087	0.603	0.567
hMG1	Xbp1	0.0116647	3.75638e-07	0.22087	0.854	0.778
hMG1	Tnf	1	0.00105808	0.220776	0.795	0.77
hMG1	Hnrnpl	0.029202	9.40391e-07	0.220707	0.788	0.768
hMG1	Ankrd44	2.32609e-05	7.4907e-10	0.220554	0.801	0.695
hMG1	Fchsd2	0.000749035	2.41212e-08	0.220433	0.728	0.646
hMG1	Eif1	1.23223e-06	3.96814e-11	0.220028	0.987	0.963
hMG1	Clec4a3	0.935904	3.01389e-05	0.220024	0.464	0.365
hMG1	Rtn1	0.0040678	1.30995e-07	0.219936	0.384	0.244
hMG1	Rbm26	0.00627434	2.02053e-07	0.21993	0.722	0.627
hMG1	Smap2	0.0325231	1.04734e-06	0.219346	0.868	0.817
hMG1	Orai1	0.0608119	1.95833e-06	0.219241	0.828	0.792
hMG1	Tmem55b	0.055188	1.77722e-06	0.219076	0.768	0.746
hMG1	Inpp5d	1.6751e-05	5.39433e-10	0.218694	0.914	0.879
hMG1	Pmp22	0.833673	2.68468e-05	0.218554	0.775	0.72
hMG1	Qk	0.000609609	1.96312e-08	0.218391	0.914	0.872
hMG1	Vmp1	1	3.84167e-05	0.218361	0.675	0.688
hMG1	Rps6ka1	0.0630624	2.0308e-06	0.217475	0.828	0.779
hMG1	Zmiz1	0.0179274	5.77316e-07	0.217003	0.795	0.739
hMG1	Pfkfb3	1	0.000392541	0.216528	0.629	0.593
hMG1	Tsc22d2	0.000855794	2.75591e-08	0.215824	0.722	0.659
hMG1	Selenok	0.123463	3.97588e-06	0.215577	0.854	0.816
hMG1	Arl4c	0.462195	1.48841e-05	0.215501	0.788	0.736
hMG1	C1qb	2.26455e-10	7.29253e-15	0.215337	1	0.98
hMG1	Lpar6	1	0.00041151	0.214838	0.483	0.415
hMG1	Clcn4	0.00190489	6.13433e-08	0.21429	0.682	0.619
hMG1	Med13l	0.000198329	6.3868e-09	0.214105	0.675	0.57
hMG1	Ddx50	0.000136537	4.39692e-09	0.213824	0.781	0.71
hMG1	Ercc5	1	0.00030513	0.213373	0.457	0.381
hMG1	Hexim1	1	0.0031228	0.213347	0.47	0.44
hMG1	Asph	0.00014323	4.61242e-09	0.2122	0.841	0.748
hMG1	Zfp622	1	0.00554848	0.212065	0.642	0.631
hMG1	Nuak1	0.0844022	2.71801e-06	0.212041	0.669	0.614
hMG1	Acox3	0.0228327	7.35281e-07	0.212017	0.795	0.719
hMG1	Slc46a1	1	0.000652356	0.210978	0.536	0.511
hMG1	Gls	0.0366774	1.18112e-06	0.210802	0.728	0.681
hMG1	Ptprj	0.00138743	4.46793e-08	0.210594	0.748	0.657
hMG1	Maml3	0.480117	1.54612e-05	0.210578	0.497	0.415
hMG1	Pld1	0.0578375	1.86254e-06	0.210259	0.662	0.587
hMG1	Nit1	1	0.000353609	0.209474	0.464	0.39
hMG1	Gnaq	1	3.92675e-05	0.209441	0.702	0.652
hMG1	Cd81	2.9238e-07	9.41552e-12	0.208009	1	0.968
hMG1	Phf14	0.000112253	3.61487e-09	0.207788	0.821	0.731
hMG1	Tagap1	0.205563	6.61975e-06	0.207431	0.358	0.223
hMG1	Mir142hg	0.263105	8.47278e-06	0.207429	0.49	0.402
hMG1	Spint1	0.0681037	2.19314e-06	0.206761	0.921	0.862
hMG1	Clip1	1	8.79367e-05	0.20642	0.649	0.629
hMG1	Eef2k	0.00437412	1.4086e-07	0.205823	0.556	0.432
hMG1	Dapp1	0.0139648	4.49709e-07	0.205804	0.781	0.703
hMG1	Hnrnph1	0.00062313	2.00667e-08	0.204789	0.801	0.744
hMG1	Rock2	0.0181135	5.8331e-07	0.2047	0.768	0.724
hMG1	Ifnar2	0.0202861	6.53274e-07	0.204307	0.828	0.771
hMG1	Taf13	1	5.28978e-05	0.203877	0.477	0.381
hMG1	Ndfip2	1	0.00333343	0.203806	0.57	0.555
hMG1	Setd1b	1	0.000134045	0.203431	0.563	0.504
hMG1	Nlrp3	1	0.000169891	0.203123	0.583	0.558
hMG1	Fcho2	0.72358	2.33015e-05	0.2028	0.689	0.644
hMG1	Dennd4a	0.000101464	3.26743e-09	0.202479	0.815	0.744
hMG1	Fcgr3	6.18447e-06	1.99158e-10	0.202465	0.993	0.941
hMG1	Ly96	1	0.000195272	0.202423	0.464	0.38
hMG1	Zfp90	0.664722	2.14061e-05	0.202373	0.536	0.458
hMG1	Irf2bpl	1	4.52762e-05	0.201914	0.742	0.705
hMG1	Bbc3	1	0.000170927	0.20186	0.523	0.431
hMG1	Tgif1	1	0.00023421	0.201857	0.609	0.576
hMG1	Serinc1	1	0.000273446	0.201679	0.755	0.744
hMG1	Zfp652	0.0206509	6.65022e-07	0.201053	0.623	0.546
hMG1	Tcf4	0.0840423	2.70641e-06	0.200832	0.861	0.806
hMG1	Slc15a4	1	0.000203984	0.200685	0.675	0.635
hMG1	Fscn1	0.0255961	8.24271e-07	0.200461	0.45	0.334
hMG1	Akr1b10	0.0740685	2.38523e-06	0.200244	0.722	0.652
pMG2	Stmn1	3.61657e-45	1.16465e-49	1.03442	0.965	0.647
pMG2	H2afz	3.04743e-59	9.81363e-64	1.02192	1	0.91
pMG2	Ube2c	2.29862e-29	7.40226e-34	0.916687	0.785	0.411
pMG2	Tubb4b	4.3121e-34	1.38863e-38	0.915204	0.91	0.685
pMG2	Birc5	1.27338e-42	4.10067e-47	0.9067	0.847	0.402
pMG2	Tubb5	4.25758e-38	1.37107e-42	0.787633	1	0.891
pMG2	Hmgb2	5.55167e-37	1.78781e-41	0.741407	0.993	0.872
pMG2	Cks1b	3.16827e-30	1.02028e-34	0.726215	0.806	0.489
pMG2	Cdc20	6.327e-28	2.03748e-32	0.716327	0.632	0.273
pMG2	Ccnb2	6.80634e-17	2.19185e-21	0.689396	0.639	0.371
pMG2	Tuba1b	7.92142e-32	2.55094e-36	0.672585	0.986	0.896
pMG2	Cenpa	5.61577e-21	1.80845e-25	0.669014	0.757	0.466
pMG2	Ifi27l2a	4.20282e-18	1.35343e-22	0.655485	0.979	0.885
pMG2	Selenoh	4.34369e-22	1.3988e-26	0.651618	0.861	0.665
pMG2	H2afx	1.11334e-15	3.58528e-20	0.646707	0.729	0.506
pMG2	H2afv	1.25173e-23	4.03094e-28	0.641988	0.833	0.585
pMG2	Cdca8	2.73313e-27	8.80151e-32	0.637744	0.757	0.388
pMG2	Ran	2.88315e-30	9.28462e-35	0.617073	0.972	0.83
pMG2	Pclaf	2.92672e-14	9.42493e-19	0.612254	0.701	0.411
pMG2	Hmgb1	3.28591e-26	1.05816e-30	0.60077	0.979	0.887
pMG2	Hmgn2	6.74321e-20	2.17152e-24	0.584783	0.882	0.715
pMG2	Ube2s	1.37735e-14	4.43548e-19	0.568874	0.854	0.759
pMG2	Cdkn3	2.21854e-13	7.14438e-18	0.561431	0.542	0.298
pMG2	Ptma	9.63842e-35	3.10386e-39	0.550139	1	0.969
pMG2	Racgap1	2.10089e-25	6.7655e-30	0.529342	0.708	0.353
pMG2	Cdca3	2.40996e-19	7.76081e-24	0.525973	0.66	0.361
pMG2	Arl6ip1	4.81651e-15	1.55106e-19	0.518074	0.944	0.893
pMG2	Cdk1	7.46135e-07	2.40278e-11	0.516745	0.583	0.422
pMG2	Txn1	3.29319e-16	1.06051e-20	0.495531	0.938	0.837
pMG2	Cenpe	4.00653e-12	1.29022e-16	0.494538	0.59	0.335
pMG2	Banf1	7.12961e-15	2.29595e-19	0.493453	0.84	0.686
pMG2	Hist1h2ap	1	9.46352e-05	0.479945	0.694	0.601
pMG2	Atpif1	1.64117e-18	5.28505e-23	0.478897	0.972	0.88
pMG2	Tagln2	3.13867e-10	1.01075e-14	0.471077	0.861	0.749
pMG2	Nudc	1.78532e-11	5.74928e-16	0.466826	0.819	0.709
pMG2	Hint1	1.4612e-21	4.7055e-26	0.465313	0.993	0.873
pMG2	Anp32b	6.31304e-12	2.03299e-16	0.461484	0.938	0.825
pMG2	Hmmr	9.9306e-10	3.19795e-14	0.460374	0.493	0.269
pMG2	Hist1h4d	1	5.58896e-05	0.457806	0.458	0.382
pMG2	Ccnb1	1.90723e-13	6.14186e-18	0.45363	0.549	0.289
pMG2	Ifitm3	1.23035e-10	3.9621e-15	0.446509	0.979	0.899
pMG2	Ppia	1.30365e-31	4.19814e-36	0.44583	0.993	0.955
pMG2	Jpt1	9.18082e-11	2.9565e-15	0.445783	0.896	0.799
pMG2	Tuba1c	1.49081e-06	4.80087e-11	0.445657	0.729	0.637
pMG2	Nucks1	4.80936e-10	1.54876e-14	0.44359	0.812	0.71
pMG2	Elob	2.71557e-16	8.74497e-21	0.442512	0.944	0.871
pMG2	Emp3	1.56334e-09	5.03441e-14	0.439761	0.903	0.779
pMG2	Rps26	4.22802e-24	1.36155e-28	0.434354	0.986	0.945
pMG2	Anp32e	5.46007e-10	1.75831e-14	0.431029	0.75	0.628
pMG2	Hmgn1	2.34051e-13	7.53713e-18	0.422559	0.91	0.789
pMG2	Gapdh	5.74797e-21	1.85102e-25	0.418635	1	0.945
pMG2	Ccna2	5.44718e-17	1.75416e-21	0.417304	0.583	0.291
pMG2	Tmsb4x	1.59954e-29	5.15101e-34	0.415328	0.993	0.994
pMG2	Rnaseh2c	7.02487e-10	2.26222e-14	0.415147	0.743	0.641
pMG2	Rps27l	3.05353e-13	9.8333e-18	0.412063	0.917	0.835
pMG2	Lsm2	4.99081e-09	1.60719e-13	0.411959	0.688	0.561
pMG2	Lsm5	4.1991e-09	1.35224e-13	0.410779	0.736	0.592
pMG2	Cenpf	2.42115e-11	7.79684e-16	0.406488	0.604	0.35
pMG2	Atp5j2	8.32218e-20	2.67999e-24	0.405555	0.993	0.881
pMG2	Uqcr10	4.16273e-10	1.34052e-14	0.405325	0.931	0.817
pMG2	Prdx1	1.03543e-11	3.33441e-16	0.402457	0.958	0.877
pMG2	Atp5j	7.75528e-12	2.49743e-16	0.401031	0.951	0.871
pMG2	Isg15	0.00469546	1.51208e-07	0.399801	0.868	0.763
pMG2	Pimreg	0.00105086	3.38407e-08	0.39661	0.34	0.196
pMG2	Ly6a	0.00112584	3.62554e-08	0.396056	0.833	0.759
pMG2	Knstrn	4.80984e-08	1.54891e-12	0.395016	0.528	0.335
pMG2	Dynll1	5.8224e-11	1.87499e-15	0.393633	0.903	0.846
pMG2	Ranbp1	0.000274231	8.83106e-09	0.392703	0.833	0.792
pMG2	Nme1	8.66088e-08	2.78906e-12	0.392524	0.875	0.76
pMG2	Cks2	7.66539e-05	2.46849e-09	0.388915	0.674	0.543
pMG2	Cbx3	0.00176886	5.69627e-08	0.386571	0.812	0.737
pMG2	Phgdh	1.475e-10	4.74994e-15	0.385675	0.882	0.803
pMG2	Cox8a	1.51627e-18	4.88284e-23	0.381997	0.986	0.932
pMG2	Cox7a2	7.17657e-10	2.31107e-14	0.379334	0.924	0.863
pMG2	Snrpf	2.62851e-11	8.46458e-16	0.378268	0.91	0.811
pMG2	Ndufa4	3.09532e-13	9.96785e-18	0.376938	0.965	0.861
pMG2	Exosc8	2.0747e-05	6.68115e-10	0.374666	0.729	0.616
pMG2	Tk1	1	4.12462e-05	0.374392	0.438	0.348
pMG2	Psmb8	3.09939e-18	9.98095e-23	0.373139	0.993	0.931
pMG2	Hist1h2bc	1	0.000171348	0.373003	0.5	0.448
pMG2	Swi5	2.34327e-10	7.54604e-15	0.370319	0.875	0.784
pMG2	Plk1	1.80934e-06	5.82662e-11	0.368685	0.444	0.249
pMG2	Ndufs5	2.68154e-09	8.63535e-14	0.368298	0.882	0.781
pMG2	Hist1h2ae	0.736238	2.37091e-05	0.368105	0.5	0.39
pMG2	Ndufa2	3.12057e-11	1.00492e-15	0.364268	0.917	0.851
pMG2	Snrpb	7.56564e-09	2.43636e-13	0.3635	0.924	0.82
pMG2	Tacc3	1.84102e-05	5.92865e-10	0.362222	0.521	0.368
pMG2	Lsm4	2.84153e-11	9.15058e-16	0.361153	0.847	0.706
pMG2	Cox7c	4.80253e-13	1.54656e-17	0.360615	0.958	0.926
pMG2	Ccdc34	0.000156912	5.05304e-09	0.359131	0.618	0.504
pMG2	Rpl41	1.00762e-19	3.24483e-24	0.358171	1	0.968
pMG2	Atp5l	4.02173e-15	1.29512e-19	0.356003	0.986	0.894
pMG2	Usmg5	6.41294e-06	2.06516e-10	0.355367	0.861	0.784
pMG2	Tspo	2.53408e-12	8.1605e-17	0.354415	0.986	0.938
pMG2	Gng5	1.34738e-09	4.33897e-14	0.35331	0.972	0.933
pMG2	Calm3	2.90326e-06	9.34936e-11	0.353009	0.826	0.744
pMG2	Cox6c	1.69104e-12	5.44567e-17	0.352514	0.979	0.905
pMG2	Atp5g1	2.29961e-09	7.40543e-14	0.34947	0.924	0.839
pMG2	Smc4	3.25343e-05	1.0477e-09	0.34889	0.639	0.494
pMG2	Tpx2	4.84957e-06	1.56171e-10	0.347253	0.535	0.351
pMG2	Cox7b	9.8494e-10	3.1718e-14	0.347207	0.938	0.837
pMG2	Aif1	3.38123e-15	1.08886e-19	0.346723	0.965	0.929
pMG2	Ddx39	2.10503e-06	6.77883e-11	0.345938	0.708	0.612
pMG2	Cox6b1	1.28979e-12	4.15351e-17	0.344624	0.965	0.88
pMG2	Pbk	0.0165769	5.33825e-07	0.344565	0.41	0.281
pMG2	Cox5b	1.75676e-08	5.6573e-13	0.342674	0.951	0.878
pMG2	Mrpl51	6.84559e-07	2.20449e-11	0.340342	0.792	0.682
pMG2	Tmsb10	4.67006e-15	1.5039e-19	0.33906	0.951	0.846
pMG2	Tma7	3.62897e-11	1.16864e-15	0.337911	0.931	0.849
pMG2	Snrpe	2.05324e-07	6.61207e-12	0.336871	0.91	0.795
pMG2	Cox5a	1.94953e-08	6.27806e-13	0.33679	0.917	0.852
pMG2	Rps17	3.52484e-16	1.1351e-20	0.336564	0.993	0.931
pMG2	Hnrnpf	2.96546e-05	9.54968e-10	0.336504	0.951	0.893
pMG2	Cox6a1	3.96309e-05	1.27623e-09	0.335606	0.917	0.843
pMG2	Dctpp1	0.000159766	5.14495e-09	0.335426	0.715	0.63
pMG2	Pnp	0.00087876	2.82987e-08	0.335112	0.951	0.865
pMG2	Ndufb11	4.49218e-08	1.44662e-12	0.335031	0.924	0.815
pMG2	Prelid1	2.11598e-06	6.81409e-11	0.334521	0.833	0.789
pMG2	Cct7	1.13322e-06	3.6493e-11	0.334183	0.799	0.771
pMG2	Cyc1	2.77401e-06	8.93314e-11	0.332032	0.812	0.718
pMG2	Sae1	1.64076e-05	5.28375e-10	0.330795	0.639	0.534
pMG2	Rpl36al	2.16415e-10	6.96921e-15	0.330672	0.924	0.859
pMG2	Uqcc2	2.50435e-05	8.06478e-10	0.330503	0.833	0.755
pMG2	Gm10076	2.35856e-10	7.59527e-15	0.329832	0.993	0.916
pMG2	Cox4i1	1.03644e-14	3.33764e-19	0.329338	1	0.93
pMG2	Rad21	0.00204023	6.57014e-08	0.32926	0.597	0.516
pMG2	Eif5a	1.13797e-08	3.6646e-13	0.328627	0.965	0.902
pMG2	Clic1	1.13044e-13	3.64035e-18	0.327107	0.986	0.935
pMG2	Atp5o.1	2.44903e-06	7.88661e-11	0.32588	0.847	0.783
pMG2	Cycs	0.000510545	1.64411e-08	0.324583	0.806	0.736
pMG2	Snrpg	3.74837e-07	1.20709e-11	0.322128	0.868	0.809
pMG2	Sf3b5	2.8685e-08	9.23744e-13	0.321555	0.792	0.698
pMG2	Snrpd2	7.69656e-05	2.47852e-09	0.321035	0.826	0.773
pMG2	Uqcrq	1.1665e-09	3.75648e-14	0.320414	0.972	0.878
pMG2	Bak1	8.76438e-05	2.8224e-09	0.319793	0.715	0.641
pMG2	Snrpd1	0.000972116	3.13051e-08	0.319543	0.826	0.72
pMG2	Asf1b	1	0.00119965	0.318724	0.354	0.296
pMG2	Atp5d	3.52644e-06	1.13562e-10	0.318413	0.917	0.84
pMG2	Rbm3	2.81019e-10	9.04964e-15	0.31806	0.986	0.915
pMG2	Reep4	1.57146e-05	5.06056e-10	0.318039	0.583	0.463
pMG2	Psmc3	1.87384e-07	6.03433e-12	0.317857	0.854	0.793
pMG2	Mrpl30	0.00850939	2.74028e-07	0.31726	0.785	0.717
pMG2	Erh	0.0347716	1.11975e-06	0.317251	0.632	0.573
pMG2	Cenpx	1.18443e-05	3.81422e-10	0.316719	0.771	0.693
pMG2	Oaz1	1.42508e-11	4.58919e-16	0.315933	0.993	0.933
pMG2	Ubald2	0.0454825	1.46467e-06	0.314811	0.736	0.68
pMG2	Dbi	1.13002e-06	3.63899e-11	0.314582	0.833	0.749
pMG2	Pycard	6.75217e-12	2.1744e-16	0.313013	0.979	0.933
pMG2	Atp5e	3.97499e-08	1.28007e-12	0.311341	0.993	0.906
pMG2	Smdt1	5.73675e-09	1.84741e-13	0.310302	0.91	0.815
pMG2	Mpc1	0.000107052	3.44739e-09	0.309931	0.896	0.826
pMG2	Rpl35	1.86511e-13	6.00622e-18	0.309897	1	0.939
pMG2	Cenpw	0.0349296	1.12484e-06	0.30965	0.438	0.339
pMG2	Mrpl57	0.0192574	6.20147e-07	0.309028	0.694	0.658
pMG2	Hdgf	0.00215776	6.94864e-08	0.308944	0.778	0.702
pMG2	Uqcr11	2.18931e-05	7.05024e-10	0.308933	0.91	0.847
pMG2	Rdm1	0.638991	2.05774e-05	0.306743	0.417	0.33
pMG2	Psma7	1.49245e-07	4.80613e-12	0.305858	0.938	0.879
pMG2	Rps12	3.32986e-17	1.07232e-21	0.305561	1	0.965
pMG2	Tomm7	3.64317e-05	1.17321e-09	0.305346	0.944	0.862
pMG2	Ybx1	2.91214e-07	9.37796e-12	0.305038	0.993	0.916
pMG2	Cdkn2c	0.329146	1.05995e-05	0.302431	0.396	0.288
pMG2	Atp5k	7.38871e-06	2.37939e-10	0.301005	0.944	0.85
pMG2	Lmnb1	0.000271714	8.75e-09	0.299235	0.701	0.608
pMG2	Kif20a	2.80985e-07	9.04856e-12	0.299214	0.382	0.193
pMG2	Atp5b	3.79524e-08	1.22218e-12	0.299159	0.951	0.93
pMG2	Ndufa5	4.56218e-05	1.46916e-09	0.29901	0.785	0.705
pMG2	Prdx4	0.000543199	1.74926e-08	0.297708	0.833	0.753
pMG2	Spc24	4.12903e-05	1.32967e-09	0.297218	0.549	0.377
pMG2	Ndufc2	9.53519e-05	3.07062e-09	0.296659	0.903	0.824
pMG2	Bola2	0.000379122	1.22089e-08	0.295954	0.889	0.797
pMG2	Fkbp2	1.17286e-05	3.77697e-10	0.29578	0.889	0.807
pMG2	Atox1	2.46358e-05	7.93347e-10	0.294867	0.944	0.868
pMG2	Ndufs6	0.000757732	2.44012e-08	0.294785	0.792	0.746
pMG2	Gpx1	5.24842e-09	1.69015e-13	0.294528	0.986	0.913
pMG2	Ndufc1	0.00130148	4.19115e-08	0.29248	0.861	0.781
pMG2	Pfn1	2.22734e-10	7.17271e-15	0.292267	0.993	0.937
pMG2	Fam96a	0.00173573	5.58956e-08	0.29086	0.785	0.756
pMG2	Rpl5	6.44727e-11	2.07622e-15	0.29074	0.993	0.941
pMG2	Thoc7	1	0.00323786	0.288961	0.618	0.66
pMG2	Rps5	1.64948e-11	5.31181e-16	0.288168	0.993	0.947
pMG2	Lsm3	0.0144523	4.65409e-07	0.287951	0.611	0.539
pMG2	Mydgf	0.000228123	7.34626e-09	0.287044	0.833	0.771
pMG2	Chmp2a	0.00220456	7.09935e-08	0.286576	0.826	0.791
pMG2	Ndufa11	0.00556389	1.79174e-07	0.286219	0.799	0.753
pMG2	Atp5f1	0.000440294	1.41788e-08	0.285802	0.889	0.866
pMG2	Ndufb7	0.0131967	4.24973e-07	0.285473	0.861	0.795
pMG2	Psmb2	0.00210661	6.78393e-08	0.285345	0.889	0.812
pMG2	Hsbp1	0.000111814	3.60076e-09	0.285089	0.875	0.829
pMG2	Taf10	2.74961e-06	8.85458e-11	0.284946	0.854	0.765
pMG2	Eno1	8.83215e-05	2.84422e-09	0.284179	0.868	0.828
pMG2	Mrpl20	0.000269202	8.66911e-09	0.284139	0.819	0.74
pMG2	Ndufa3	1.67279e-05	5.38687e-10	0.283461	0.958	0.855
pMG2	Atp5g3	0.0133762	4.30753e-07	0.283137	0.882	0.784
pMG2	Rplp1	5.9297e-16	1.90954e-20	0.282222	1	0.963
pMG2	Dpm3	0.100606	3.23983e-06	0.282122	0.833	0.757
pMG2	Pin4	0.0353604	1.13871e-06	0.281856	0.611	0.56
pMG2	Sh3bgrl3	5.76746e-10	1.8573e-14	0.281629	0.979	0.93
pMG2	Ndufb9	0.000350871	1.12991e-08	0.281	0.896	0.826
pMG2	Pmf1	0.300516	9.67752e-06	0.280915	0.514	0.458
pMG2	Mif	1	0.000150247	0.280426	0.889	0.826
pMG2	Prc1	0.00509298	1.64009e-07	0.279597	0.451	0.296
pMG2	Psma4	0.000799195	2.57365e-08	0.278224	0.833	0.808
pMG2	Rpl37a	2.35272e-10	7.57646e-15	0.276749	1	0.963
pMG2	Eif2s2	0.000778491	2.50697e-08	0.276687	0.965	0.916
pMG2	Rpl37	5.76246e-07	1.85569e-11	0.276575	1	0.971
pMG2	Mdh1	0.0112679	3.6286e-07	0.276159	0.792	0.773
pMG2	Rps20	3.18943e-12	1.02709e-16	0.275415	1	0.968
pMG2	Nde1	1	6.42315e-05	0.275346	0.451	0.39
pMG2	Mki67	2.95389e-05	9.51242e-10	0.27524	0.667	0.449
pMG2	Bag1	0.000225111	7.24926e-09	0.275209	0.91	0.839
pMG2	Krtcap2	0.000529293	1.70448e-08	0.274206	0.917	0.841
pMG2	Rpl29	7.23105e-10	2.32861e-14	0.273849	1	0.94
pMG2	Sumo2	1	8.64936e-05	0.272965	0.903	0.84
pMG2	Psmb9	0.001791	5.76755e-08	0.272226	0.931	0.851
pMG2	Rbx1	8.29918e-05	2.67259e-09	0.27173	0.896	0.835
pMG2	Atp5g2	0.000224822	7.23993e-09	0.271647	0.958	0.914
pMG2	Cd52	5.47167e-08	1.76204e-12	0.270907	0.993	0.95
pMG2	Uqcrfs1	0.0111288	3.58382e-07	0.270299	0.736	0.731
pMG2	Ndufv2	0.00202997	6.53713e-08	0.269606	0.743	0.7
pMG2	Tgfbi	1	0.000610372	0.268281	0.646	0.621
pMG2	Tyms	1	0.00576548	0.268062	0.451	0.438
pMG2	Smc2	0.911373	2.93489e-05	0.267588	0.576	0.483
pMG2	Nol7	1	6.5116e-05	0.267255	0.757	0.725
pMG2	Rpl28	3.40477e-11	1.09644e-15	0.267194	1	0.963
pMG2	Ssr2	0.000610995	1.96759e-08	0.266261	0.882	0.821
pMG2	Ptges3	1	3.22043e-05	0.264932	0.806	0.752
pMG2	Rpl38	1.87115e-06	6.02566e-11	0.264406	1	0.953
pMG2	Rangap1	1	0.000307489	0.263967	0.549	0.505
pMG2	Nusap1	1	3.2363e-05	0.263792	0.41	0.291
pMG2	Atp5h	0.000296259	9.54045e-09	0.263507	0.944	0.875
pMG2	Rpl15	5.57151e-12	1.79419e-16	0.26345	0.993	0.948
pMG2	Ndufa12	0.000573617	1.84722e-08	0.262059	0.847	0.78
pMG2	Ldha	0.0154973	4.99059e-07	0.262027	0.951	0.891
pMG2	Psma2	0.000421688	1.35796e-08	0.261556	0.882	0.817
pMG2	Gm11808	0.0309065	9.95282e-07	0.260379	0.667	0.635
pMG2	Rps18	4.76742e-10	1.53525e-14	0.260344	1	0.959
pMG2	Mrpl18	1	0.000644602	0.260243	0.736	0.702
pMG2	Sec61g	0.00185461	5.97239e-08	0.260223	0.958	0.883
pMG2	Rpl11	4.20516e-09	1.35419e-13	0.260204	1	0.959
pMG2	Rpl39	7.26546e-12	2.3397e-16	0.259811	1	0.962
pMG2	Pds5b	1	3.88783e-05	0.259732	0.181	0.392
pMG2	Rpl27	5.82172e-05	1.87477e-09	0.259709	0.944	0.901
pMG2	Cotl1	5.7344e-06	1.84665e-10	0.259685	0.958	0.929
pMG2	Snrpd3	0.0245309	7.89969e-07	0.258469	0.757	0.708
pMG2	Lsm6	1	3.34671e-05	0.258343	0.736	0.722
pMG2	Pdcd5	1	0.000161371	0.257734	0.715	0.725
pMG2	Rps16	8.7096e-08	2.80475e-12	0.257694	1	0.956
pMG2	Rps2	2.33115e-05	7.50702e-10	0.257153	0.986	0.94
pMG2	Calm1	3.95467e-07	1.27352e-11	0.256528	1	0.935
pMG2	Ndufb8	0.00412074	1.327e-07	0.256458	0.854	0.793
pMG2	Cnih4	1	0.000186745	0.256134	0.75	0.742
pMG2	Psmb4	0.123647	3.98179e-06	0.255092	0.84	0.826
pMG2	Serf2	8.23991e-05	2.6535e-09	0.254706	0.993	0.936
pMG2	Eloc	0.0046849	1.50868e-07	0.254598	0.833	0.753
pMG2	Ywhaq	0.0005615	1.8082e-08	0.254542	0.729	0.703
pMG2	Rplp2	6.24079e-09	2.00972e-13	0.254503	0.993	0.954
pMG2	Zbp1	0.0289007	9.30691e-07	0.25442	0.903	0.817
pMG2	Lamtor5	0.0431367	1.38913e-06	0.254283	0.694	0.681
pMG2	Psme1	3.56258e-05	1.14726e-09	0.254176	0.965	0.938
pMG2	Psmc4	1	0.000353571	0.253491	0.694	0.688
pMG2	Rps23	1.02345e-12	3.29583e-17	0.253362	1	0.953
pMG2	Mrps14	1	0.00017555	0.253088	0.743	0.724
pMG2	Psmb6	0.00146065	4.70374e-08	0.252762	0.875	0.827
pMG2	U2af1	1	0.000198864	0.252754	0.757	0.735
pMG2	Tmem258	0.160469	5.1676e-06	0.252672	0.854	0.811
pMG2	Rack1	6.69915e-12	2.15733e-16	0.252444	1	0.955
pMG2	Nedd8	0.0130018	4.18696e-07	0.252369	0.903	0.829
pMG2	Rpl14	2.17095e-08	6.99111e-13	0.252291	1	0.943
pMG2	Psmc6	0.762118	2.45425e-05	0.251792	0.722	0.711
pMG2	Bub3	0.000419984	1.35247e-08	0.251293	0.771	0.702
pMG2	Rps28	0.00073811	2.37694e-08	0.251279	1	0.946
pMG2	Ndufa7	0.103247	3.32487e-06	0.249927	0.868	0.829
pMG2	Rps6	5.59766e-07	1.80262e-11	0.249683	0.986	0.949
pMG2	Pfdn6	1	8.36814e-05	0.249281	0.604	0.612
pMG2	Psma5	0.000906288	2.91852e-08	0.249229	0.847	0.783
pMG2	Rrm2	1	0.00258429	0.249079	0.34	0.276
pMG2	Rpl21	7.57214e-08	2.43846e-12	0.248964	1	0.956
pMG2	2010107E04Rik	0.00292145	9.40793e-08	0.248185	0.938	0.846
pMG2	Rpl24	1.81688e-10	5.85089e-15	0.247727	1	0.947
pMG2	Npl	1	0.000983726	0.247599	0.646	0.647
pMG2	Mrpl52	0.00265314	8.54391e-08	0.247218	0.938	0.88
pMG2	Uqcrb	0.000418127	1.34649e-08	0.246988	0.903	0.84
pMG2	Rps29	4.54712e-06	1.46431e-10	0.24652	1	0.977
pMG2	Rps19	1.63551e-09	5.26684e-14	0.246478	1	0.959
pMG2	Pomp	4.9891e-05	1.60664e-09	0.246077	0.958	0.91
pMG2	Ubl5	0.0448763	1.44515e-06	0.245761	0.896	0.869
pMG2	Pla2g16	0.191728	6.17421e-06	0.245496	0.729	0.698
pMG2	Psmb10	0.01279	4.11876e-07	0.244138	0.882	0.851
pMG2	Spcs2	0.00199794	6.43396e-08	0.244052	0.903	0.866
pMG2	Ak6	1	0.0050155	0.243733	0.493	0.492
pMG2	Psmb5	0.0010873	3.50142e-08	0.243374	0.861	0.798
pMG2	Psmb3	0.00284532	9.16277e-08	0.243233	0.847	0.807
pMG2	Ywhae	0.00143389	4.61754e-08	0.243157	0.958	0.898
pMG2	Uqcrh	0.000114891	3.69982e-09	0.24292	0.951	0.887
pMG2	Bcl2a1a	0.994413	3.20231e-05	0.2422	0.729	0.696
pMG2	Psma6	0.04569	1.47135e-06	0.242008	0.799	0.747
pMG2	Fau	6.3657e-08	2.04995e-12	0.241612	1	0.974
pMG2	Romo1	0.0484028	1.55872e-06	0.24138	0.847	0.786
pMG2	Rps24	3.26759e-10	1.05226e-14	0.241074	1	0.96
pMG2	Rps27a	2.82206e-09	9.08787e-14	0.241056	1	0.968
pMG2	Cebpzos	1	9.98316e-05	0.240815	0.771	0.744
pMG2	Eif1b	0.133493	4.29887e-06	0.240456	0.729	0.701
pMG2	Rpl12	3.8699e-10	1.24622e-14	0.240227	1	0.959
pMG2	Glrx	1	0.00182766	0.240144	0.681	0.671
pMG2	Actb	8.29179e-09	2.67021e-13	0.239604	1	0.999
pMG2	Snrpa1	1	0.000497769	0.239195	0.632	0.617
pMG2	Coa3	0.316423	1.01898e-05	0.239123	0.674	0.652
pMG2	Lap3	0.06688	2.15374e-06	0.239118	0.938	0.885
pMG2	Arpp19	0.3113	1.00248e-05	0.238982	0.882	0.833
pMG2	Park7	0.89832	2.89286e-05	0.238371	0.868	0.802
pMG2	Dnajc19	1	4.6021e-05	0.238296	0.715	0.674
pMG2	Snrnp27	1	0.00202679	0.236503	0.688	0.696
pMG2	Rpl26	8.46248e-08	2.72517e-12	0.236221	0.993	0.95
pMG2	Snx3	0.208824	6.72476e-06	0.236184	0.833	0.793
pMG2	Tmem160	0.217267	6.99665e-06	0.235933	0.819	0.764
pMG2	Ubl4a	1	0.000253222	0.23576	0.549	0.519
pMG2	Rps15	2.29827e-06	7.40112e-11	0.23551	0.993	0.964
pMG2	Rfc5	1	0.00243726	0.235371	0.389	0.352
pMG2	Uba52	0.125989	4.05722e-06	0.235263	0.917	0.91
pMG2	Ptms	0.203205	6.54383e-06	0.234793	0.924	0.901
pMG2	Ndufa13	0.0375465	1.20911e-06	0.234694	0.951	0.885
pMG2	Top2a	0.0214887	6.92e-07	0.234311	0.653	0.495
pMG2	Rps13	1.27682e-07	4.11176e-12	0.233742	1	0.953
pMG2	Anapc11	1	0.00928087	0.233253	0.66	0.685
pMG2	Eif3g	1	0.00293981	0.23314	0.66	0.682
pMG2	Serp1	0.0299416	9.64208e-07	0.232845	0.882	0.851
pMG2	Sptssa	1	9.63755e-05	0.232692	0.681	0.655
pMG2	Phf11b	1	0.000407288	0.232206	0.75	0.727
pMG2	Hnrnpa1	0.335914	1.08174e-05	0.231923	0.931	0.899
pMG2	Rps8	8.78336e-08	2.82851e-12	0.23182	1	0.979
pMG2	Rps15a	8.09721e-09	2.60754e-13	0.231547	1	0.955
pMG2	Nsa2	0.83456	2.68753e-05	0.231378	0.924	0.872
pMG2	Rer1	0.25971	8.36343e-06	0.23095	0.875	0.82
pMG2	Melk	0.219205	7.05907e-06	0.230882	0.299	0.184
pMG2	Tpi1	1	5.38216e-05	0.23051	0.84	0.798
pMG2	Tomm22	1	0.00166177	0.230299	0.743	0.741
pMG2	Rpl22	0.000543743	1.75102e-08	0.230008	0.993	0.926
pMG2	Rtraf	0.000224776	7.23845e-09	0.229704	0.917	0.826
pMG2	Dynll2	1	0.00513442	0.229534	0.604	0.615
pMG2	1810037I17Rik	1	0.000338012	0.22939	0.708	0.705
pMG2	Rps4x	4.4731e-08	1.44047e-12	0.229308	1	0.955
pMG2	Minos1	0.0888432	2.86102e-06	0.229047	0.854	0.799
pMG2	Rbm8a	0.661412	2.12995e-05	0.228932	0.757	0.729
pMG2	Hspe1	1	3.61538e-05	0.228836	0.972	0.887
pMG2	Fth1	1	3.68237e-05	0.228737	1	0.983
pMG2	Trmt112	1	0.000182101	0.22868	0.771	0.773
pMG2	Cmpk1	0.00377723	1.21638e-07	0.228477	0.729	0.672
pMG2	Hnrnpa3	4.09244e-05	1.31789e-09	0.228339	0.917	0.889
pMG2	Mrps15	1	3.82387e-05	0.228036	0.708	0.694
pMG2	Psmb1	7.78595e-05	2.50731e-09	0.227275	0.91	0.849
pMG2	Eif1ax	1	0.000504731	0.22668	0.583	0.587
pMG2	Sem1	0.0297406	9.57738e-07	0.226196	0.958	0.891
pMG2	Atp5c1	0.356725	1.14876e-05	0.22612	0.944	0.858
pMG2	Psat1	1	0.00300934	0.225796	0.535	0.543
pMG2	Rpl31	0.00323638	1.04221e-07	0.225664	0.993	0.921
pMG2	Btf3	0.000289484	9.32224e-09	0.224864	0.958	0.916
pMG2	Gngt2	1	0.000170982	0.22477	0.882	0.798
pMG2	Nuf2	1	0.000127057	0.224303	0.326	0.228
pMG2	Tmem14c	0.0535844	1.72558e-06	0.223903	0.917	0.851
pMG2	Esd	0.115586	3.72223e-06	0.223614	0.792	0.758
pMG2	Pgk1	1	0.000202578	0.223466	0.75	0.745
pMG2	Rpl3	1.43215e-06	4.61196e-11	0.223314	1	0.96
pMG2	Ckap2l	0.955098	3.0757e-05	0.22321	0.438	0.329
pMG2	Psmb7	0.766914	2.46969e-05	0.222712	0.729	0.722
pMG2	Rpl36	0.000180198	5.80292e-09	0.222652	1	0.946
pMG2	Eif3k	0.00524772	1.68992e-07	0.222563	0.882	0.85
pMG2	Taldo1	0.00119895	3.86098e-08	0.222505	0.938	0.879
pMG2	Polr2f	1	0.000990699	0.222496	0.681	0.661
pMG2	Rpl27a	6.01508e-09	1.93704e-13	0.222252	1	0.977
pMG2	Ndufs8	1	3.28591e-05	0.221613	0.75	0.727
pMG2	H3f3a	0.00190675	6.14031e-08	0.221455	0.993	0.943
pMG2	Rpl36a	0.115897	3.73222e-06	0.221156	1	0.926
pMG2	Rpl35a	2.26618e-06	7.29779e-11	0.220475	1	0.967
pMG2	Cenpm	0.0433013	1.39443e-06	0.220309	0.389	0.265
pMG2	Ndufb10	0.53844	1.73394e-05	0.220305	0.743	0.745
pMG2	Rps21	0.0613816	1.97667e-06	0.219648	1	0.97
pMG2	Serbp1	0.0866507	2.79041e-06	0.21957	0.965	0.924
pMG2	Nop10	1	0.00153938	0.219475	0.708	0.689
pMG2	Sec11c	1	5.56317e-05	0.219334	0.847	0.818
pMG2	Gtf2h5	0.278542	8.96988e-06	0.218726	0.708	0.676
pMG2	Rpl18a	9.50649e-09	3.06138e-13	0.218356	1	0.972
pMG2	Cct8	1	0.000195238	0.217969	0.785	0.791
pMG2	Ap2s1	1	8.31239e-05	0.217844	0.785	0.76
pMG2	Capg	1	9.26926e-05	0.217595	0.75	0.709
pMG2	Vdac2	0.00252107	8.11862e-08	0.217246	0.924	0.893
pMG2	Nudt21	1	0.00157982	0.216902	0.556	0.554
pMG2	Srsf3	1	3.27257e-05	0.216673	0.931	0.897
pMG2	Dek	1	0.000262553	0.216188	0.854	0.815
pMG2	Selenof	0.150046	4.83194e-06	0.216051	0.917	0.877
pMG2	Sdhb	1	8.64019e-05	0.215984	0.819	0.789
pMG2	Ddb1	1	0.00434535	0.214341	0.597	0.601
pMG2	Nhp2	0.0312614	1.00671e-06	0.21422	0.708	0.649
pMG2	Rps7	0.000140917	4.53795e-09	0.214192	1	0.95
pMG2	Sec61b	1	3.49532e-05	0.214127	0.889	0.859
pMG2	Rps10	1.75349e-06	5.64677e-11	0.213884	1	0.961
pMG2	Tmem256	1	0.000229578	0.213863	0.826	0.763
pMG2	Cdc42	0.00581038	1.87112e-07	0.213815	0.958	0.939
pMG2	Ndufb3	1	0.000126952	0.213745	0.757	0.743
pMG2	Rpl10a	6.68068e-07	2.15138e-11	0.213737	0.993	0.963
pMG2	Atp6v1g1	0.0639984	2.06094e-06	0.213104	0.944	0.881
pMG2	Rplp0	1.90986e-07	6.15033e-12	0.213094	1	0.959
pMG2	Sf3b6	1	0.000124582	0.212667	0.736	0.72
pMG2	Lamtor2	1	4.08179e-05	0.211689	0.75	0.742
pMG2	Dynlrb1	1	0.000138501	0.211393	0.771	0.734
pMG2	Rpl30	1.24197e-06	3.99951e-11	0.211337	1	0.968
pMG2	Rps3a1	2.39884e-09	7.72497e-14	0.210836	1	0.96
pMG2	Psmc5	1	0.000162747	0.2108	0.743	0.714
pMG2	Ormdl2	1	0.00307442	0.210334	0.597	0.607
pMG2	Rpl19	2.34485e-05	7.55111e-10	0.210183	1	0.96
pMG2	Ptpn18	0.0472194	1.52061e-06	0.210156	0.972	0.899
pMG2	Gemin6	1	0.00465747	0.209955	0.34	0.297
pMG2	Trappc1	1	0.00016288	0.209698	0.611	0.616
pMG2	Mrps33	1	0.000102355	0.209297	0.757	0.713
pMG2	Brk1	1	0.000810546	0.208896	0.875	0.835
pMG2	Eif6	1	0.000550116	0.208068	0.694	0.688
pMG2	AW112010	1	0.00133834	0.207808	0.84	0.793
pMG2	Arpc3	0.00485502	1.56346e-07	0.207664	0.944	0.919
pMG2	Pdap1	1	0.00162277	0.206975	0.771	0.755
pMG2	Selenow	0.0229299	7.3841e-07	0.206941	0.938	0.829
pMG2	Ndufb6	1	0.000199715	0.206841	0.688	0.678
pMG2	Magoh	1	0.00106182	0.206614	0.59	0.596
pMG2	Rpl18	9.27565e-07	2.98704e-11	0.206564	0.993	0.963
pMG2	Rps11	1.14333e-06	3.68187e-11	0.206536	1	0.964
pMG2	Arhgdia	0.000637086	2.05161e-08	0.206388	0.951	0.906
pMG2	Mrfap1	0.0482978	1.55534e-06	0.205873	0.875	0.848
pMG2	Cnih1	1	0.00270601	0.205498	0.611	0.632
pMG2	Rps25	6.9389e-05	2.23453e-09	0.205483	0.993	0.941
pMG2	Rpl23	3.02318e-06	9.73555e-11	0.204698	1	0.965
pMG2	Txndc17	0.230305	7.41651e-06	0.204516	0.799	0.76
pMG2	Ndufa6	1	0.00468414	0.204321	0.819	0.809
pMG2	Alyref	1	0.000907604	0.204203	0.618	0.604
pMG2	Sap18	0.209513	6.74694e-06	0.204013	0.708	0.642
pMG2	Grpel1	1	5.34303e-05	0.203599	0.653	0.628
pMG2	Psmc2	0.498698	1.60596e-05	0.203536	0.708	0.713
pMG2	Lamtor1	1	0.000808166	0.20326	0.826	0.81
pMG2	Slc25a5	0.0356215	1.14712e-06	0.20321	0.979	0.91
pMG2	Pfdn1	1	0.000580859	0.202969	0.625	0.632
pMG2	Rpsa	9.28635e-06	2.99048e-10	0.202968	1	0.986
pMG2	Spcs1	0.0377832	1.21673e-06	0.202757	0.875	0.824
pMG2	Csnk2b	1	0.000188171	0.202433	0.771	0.743
pMG2	Vapa	1	0.00115087	0.202402	0.812	0.795
pMG2	Rpl8	2.31268e-06	7.44752e-11	0.202384	1	0.96
pMG2	Npm1	0.761913	2.45359e-05	0.20236	0.958	0.919
pMG2	Set	0.269422	8.67619e-06	0.201512	0.931	0.867
pMG2	Cwc15	1	0.00257086	0.201241	0.722	0.718
pMG2	Psma1	1	0.000114091	0.201085	0.84	0.831
pMG2	Cetn3	1	0.00113745	0.200953	0.66	0.678
pMG2	Naa38	1	0.000669348	0.200202	0.708	0.7
pMG2	Ppp1r14b	0.362619	1.16774e-05	0.200096	0.896	0.843
hMG2	Gm42418	1.89283e-37	6.09549e-42	1.76165	1	1
hMG2	Malat1	1.33419e-62	4.2965e-67	1.65007	1	0.946
hMG2	mt-Nd2	1.92104e-37	6.18632e-42	1.56969	0.945	0.969
hMG2	mt-Co3	1.41635e-40	4.56108e-45	1.55433	0.992	0.992
hMG2	mt-Cytb	2.71743e-40	8.75096e-45	1.52646	0.992	0.992
hMG2	mt-Atp6	1.60264e-32	5.16097e-37	1.46495	0.984	0.993
hMG2	mt-Nd4	1.98607e-37	6.39573e-42	1.45191	0.977	0.981
hMG2	mt-Nd1	1.71854e-28	5.53421e-33	1.45177	0.93	0.977
hMG2	mt-Co2	1.13322e-35	3.64931e-40	1.43557	0.984	0.992
hMG2	mt-Co1	1.50728e-34	4.85389e-39	1.36564	0.969	0.992
hMG2	AY036118	1.39528e-20	4.49321e-25	1.2611	0.773	0.814
hMG2	mt-Nd3	9.4221e-22	3.0342e-26	1.22841	0.852	0.937
hMG2	Lars2	0.0156321	5.03401e-07	1.21785	0.539	0.581
hMG2	Ccnl1	2.94375e-35	9.47976e-40	1.21171	0.922	0.88
hMG2	Mlxipl	1	9.01255e-05	1.16996	0.508	0.606
hMG2	Ranbp2	8.12358e-30	2.61604e-34	1.1633	0.852	0.812
hMG2	AC149090.1	3.74666e-30	1.20654e-34	1.14749	0.883	0.859
hMG2	Fus	6.84643e-34	2.20476e-38	1.14098	0.914	0.934
hMG2	AC160336.1	0.000162002	5.21697e-09	1.1331	0.789	0.833
hMG2	Luc7l2	1.11402e-37	3.58748e-42	1.13088	0.953	0.91
hMG2	Phip	1.50436e-07	4.84448e-12	1.12133	0.641	0.701
hMG2	Nav3	8.90196e-24	2.8667e-28	1.11909	0.812	0.807
hMG2	Top2a	0.711959	2.29272e-05	1.11788	0.508	0.508
hMG2	Mycbp2	1.06574e-17	3.432e-22	1.10705	0.75	0.815
hMG2	Kcnq1ot1	1	0.00361636	1.0924	0.484	0.599
hMG2	Zc3h7a	0.00874977	2.81769e-07	1.07501	0.562	0.653
hMG2	Mki67	1	0.00479495	1.06675	0.43	0.471
hMG2	Zeb2	1.27201e-26	4.09625e-31	1.06655	0.898	0.893
hMG2	Camk2d	5.85686e-23	1.88609e-27	1.05355	0.82	0.818
hMG2	Dst	4.33901e-15	1.39729e-19	1.04788	0.742	0.792
hMG2	Son	3.1751e-46	1.02248e-50	1.04438	0.984	0.959
hMG2	Macf1	1.10789e-18	3.56773e-23	1.03123	0.781	0.838
hMG2	Gm26917	4.03737e-07	1.30015e-11	1.02977	0.688	0.737
hMG2	Stat2	0.831227	2.6768e-05	1.0123	0.555	0.714
hMG2	Jmjd1c	9.34446e-16	3.0092e-20	1.0052	0.758	0.81
hMG2	Dock4	3.02382e-16	9.73762e-21	0.999257	0.734	0.769
hMG2	Elmo1	4.60289e-07	1.48227e-11	0.996618	0.641	0.72
hMG2	Nsd2	0.617881	1.98976e-05	0.987028	0.539	0.651
hMG2	Tra2b	2.33674e-38	7.52502e-43	0.984786	0.961	0.919
hMG2	Ncapd3	1	0.00397824	0.984552	0.375	0.382
hMG2	Dennd4a	7.19104e-07	2.31573e-11	0.971105	0.672	0.757
hMG2	Ankrd11	1.94997e-13	6.27948e-18	0.968048	0.758	0.835
hMG2	Nisch	0.0132891	4.2795e-07	0.954554	0.609	0.793
hMG2	Ivns1abp	3.64836e-11	1.17488e-15	0.953998	0.727	0.836
hMG2	Atrx	0.012968	4.17608e-07	0.949751	0.594	0.742
hMG2	Zufsp	0.000449271	1.44679e-08	0.943993	0.602	0.704
hMG2	Mef2a	8.61116e-27	2.77305e-31	0.937473	0.875	0.892
hMG2	Sfpq	1.76274e-20	5.67655e-25	0.93127	0.82	0.892
hMG2	Skil	1.70686e-10	5.4966e-15	0.929626	0.719	0.823
hMG2	Cspp1	1	0.00571782	0.926457	0.453	0.56
hMG2	Pag1	2.48103e-16	7.98967e-21	0.922405	0.758	0.807
hMG2	Mef2c	8.13682e-30	2.6203e-34	0.922375	0.938	0.928
hMG2	Snrnp70	4.70652e-18	1.51564e-22	0.920857	0.805	0.896
hMG2	Smchd1	0.000164435	5.2953e-09	0.915702	0.617	0.73
hMG2	Rsrp1	2.04436e-13	6.58344e-18	0.913343	0.773	0.893
hMG2	Git2	1.36689e-10	4.4018e-15	0.912041	0.711	0.814
hMG2	Chka	1.65641e-07	5.33414e-12	0.911203	0.688	0.764
hMG2	Ddx3x	2.75725e-08	8.87917e-13	0.90876	0.695	0.795
hMG2	Taf15	0.0177637	5.72046e-07	0.901926	0.586	0.735
hMG2	AU020206	3.10451e-15	9.99744e-20	0.897903	0.758	0.842
hMG2	Frmd4a	3.70471e-18	1.19303e-22	0.89216	0.789	0.834
hMG2	Mkln1	9.46137e-06	3.04685e-10	0.885361	0.641	0.75
hMG2	Dock10	0.00477483	1.53764e-07	0.884182	0.602	0.723
hMG2	mt-Nd5	3.9444e-05	1.27022e-09	0.884051	0.656	0.797
hMG2	Mbnl1	1.06912e-22	3.4429e-27	0.878823	0.859	0.91
hMG2	Nktr	5.89597e-20	1.89868e-24	0.875956	0.812	0.838
hMG2	Taf1d	4.88363e-08	1.57268e-12	0.872937	0.703	0.832
hMG2	Safb2	0.000157039	5.05712e-09	0.86978	0.609	0.725
hMG2	Chd7	1.61237e-12	5.19233e-17	0.867916	0.734	0.824
hMG2	Tra2a	7.23705e-11	2.33055e-15	0.864207	0.766	0.848
hMG2	Atp8a1	1.33022e-18	4.28372e-23	0.859085	0.82	0.882
hMG2	Prpf4b	0.0318971	1.02718e-06	0.859009	0.602	0.794
hMG2	Ankrd44	3.5351e-05	1.13841e-09	0.858418	0.617	0.712
hMG2	Herc2	0.754255	2.42893e-05	0.855228	0.57	0.742
hMG2	Cit	1	0.00641224	0.854882	0.32	0.295
hMG2	Ophn1	0.00198594	6.39531e-08	0.849703	0.625	0.783
hMG2	Eif5	8.24981e-21	2.65669e-25	0.849406	0.859	0.912
hMG2	Rbm39	9.44887e-35	3.04282e-39	0.846622	1	0.966
hMG2	R3hdm1	1	0.000186549	0.83747	0.516	0.641
hMG2	Smg1	1	0.00126036	0.835913	0.484	0.604
hMG2	Birc6	0.109119	3.51395e-06	0.835636	0.562	0.685
hMG2	Tmcc3	0.00231695	7.46129e-08	0.835182	0.602	0.698
hMG2	Sbno2	0.0267585	8.61704e-07	0.83408	0.586	0.73
hMG2	Ankrd17	1	0.00033278	0.832634	0.555	0.758
hMG2	Runx1	4.67755e-12	1.50631e-16	0.8277	0.773	0.85
hMG2	Kmt2a	1	0.000865582	0.827632	0.5	0.628
hMG2	Tet2	1	0.0052196	0.827071	0.445	0.535
hMG2	Rbm25	3.39329e-13	1.09274e-17	0.822324	0.766	0.889
hMG2	Ppm1h	1	0.000246187	0.816883	0.539	0.71
hMG2	Arglu1	0.000157555	5.07375e-09	0.816446	0.648	0.821
hMG2	Ash1l	1	0.000414727	0.814908	0.531	0.696
hMG2	Pik3r1	3.14613e-09	1.01315e-13	0.814564	0.703	0.808
hMG2	Nrip1	0.00349986	1.12706e-07	0.813649	0.633	0.784
hMG2	Arid5b	1	0.00837299	0.810022	0.508	0.694
hMG2	Srgap2	1.74325e-08	5.6138e-13	0.80819	0.695	0.816
hMG2	Clk1	1.93719e-11	6.23834e-16	0.804931	0.766	0.852
hMG2	Nufip2	1	0.000704972	0.802996	0.523	0.683
hMG2	Wnk1	2.33092e-12	7.50627e-17	0.802583	0.797	0.91
hMG2	Arhgap5	4.70591e-06	1.51545e-10	0.801138	0.672	0.814
hMG2	Mertk	2.67067e-11	8.60037e-16	0.796098	0.789	0.849
hMG2	Map4k4	3.72586e-05	1.19984e-09	0.793912	0.656	0.824
hMG2	Arhgap17	8.74356e-06	2.81569e-10	0.785857	0.656	0.788
hMG2	Srek1	1	0.00503204	0.78539	0.492	0.655
hMG2	Zcchc7	1	0.00113441	0.780388	0.531	0.718
hMG2	Setd5	1	0.00420928	0.779969	0.5	0.671
hMG2	Hps3	1	0.00419959	0.779076	0.523	0.745
hMG2	Tcf4	5.31746e-08	1.71238e-12	0.774813	0.703	0.82
hMG2	9930111J21Rik2	1	3.49179e-05	0.774225	0.57	0.744
hMG2	Fyb	1.9607e-14	6.31404e-19	0.774141	0.812	0.925
hMG2	Stag1	1	0.000915265	0.767917	0.508	0.654
hMG2	Zcchc6	0.0331204	1.06658e-06	0.763575	0.617	0.815
hMG2	Arhgap45	0.161088	5.18752e-06	0.761955	0.586	0.746
hMG2	Mbnl2	0.00118561	3.81801e-08	0.757349	0.641	0.794
hMG2	Hnrnpa2b1	1.14001e-15	3.67117e-20	0.756037	0.883	0.969
hMG2	Lacc1	0.0107718	3.46885e-07	0.749189	0.625	0.795
hMG2	Lrp1	2.36232e-06	7.60737e-11	0.745731	0.727	0.887
hMG2	Pnisr	1	0.0011879	0.745691	0.539	0.747
hMG2	Ssh2	2.18935e-05	7.05036e-10	0.744635	0.711	0.842
hMG2	mt-Nd4l	1	0.00250942	0.743699	0.531	0.724
hMG2	Prpf38b	6.01881e-08	1.93824e-12	0.741302	0.734	0.83
hMG2	Phf20l1	0.565573	1.82132e-05	0.740755	0.57	0.728
hMG2	Ube2d3	1.96797e-12	6.33745e-17	0.738881	0.852	0.953
hMG2	Pnn	0.0301908	9.72235e-07	0.7309	0.602	0.758
hMG2	Nfkb1	1	0.000244972	0.725564	0.562	0.758
hMG2	Sbno1	1	0.00428498	0.724259	0.5	0.675
hMG2	2810474O19Rik	1	0.000439937	0.721804	0.562	0.77
hMG2	Ptpre	1	0.00817471	0.717116	0.531	0.774
hMG2	Slc38a2	5.22229e-07	1.68173e-11	0.715395	0.727	0.882
hMG2	Fubp1	1	0.00418477	0.712454	0.539	0.758
hMG2	Adap2	1	9.64954e-05	0.712321	0.586	0.772
hMG2	Dhx9	1	0.00816194	0.711997	0.516	0.734
hMG2	Hnrnph1	1	0.00383859	0.709332	0.539	0.767
hMG2	Gnl3	0.392385	1.2636e-05	0.706458	0.594	0.78
hMG2	Tanc2	0.000930189	2.99549e-08	0.703414	0.648	0.786
hMG2	Smad7	0.00497674	1.60266e-07	0.701518	0.688	0.829
hMG2	Pde3b	0.0382439	1.23157e-06	0.697054	0.602	0.777
hMG2	Srsf11	1.04301e-06	3.35882e-11	0.693188	0.695	0.87
hMG2	Picalm	1.80851e-09	5.82396e-14	0.690596	0.781	0.928
hMG2	Epb41l2	9.82793e-17	3.16489e-21	0.689886	0.898	0.916
hMG2	Foxn3	1	0.000109262	0.682348	0.578	0.765
hMG2	Tacc1	1	4.33631e-05	0.681706	0.617	0.863
hMG2	Rhoh	0.818556	2.636e-05	0.677654	0.648	0.847
hMG2	Phf14	1	0.00115945	0.675477	0.547	0.755
hMG2	Tgfbr1	0.100311	3.2303e-06	0.671839	0.641	0.836
hMG2	Jun	2.21894e-08	7.14564e-13	0.670845	0.875	0.9
hMG2	Frmd4b	1	0.00306247	0.670658	0.531	0.725
hMG2	Slc15a3	0.00844358	2.71909e-07	0.669849	0.773	0.902
hMG2	Bclaf1	1	0.000127208	0.665347	0.586	0.806
hMG2	Ptprc	1.35625e-10	4.36754e-15	0.66518	0.789	0.928
hMG2	Bptf	1	0.00333275	0.660012	0.531	0.74
hMG2	Hpgds	0.000181406	5.84181e-09	0.65229	0.727	0.886
hMG2	Tcirg1	1	0.00316012	0.644573	0.547	0.776
hMG2	Ddx21	1	0.00524987	0.641923	0.547	0.794
hMG2	Bod1l	1	0.0071872	0.638129	0.508	0.691
hMG2	Atp2b1	0.220275	7.09353e-06	0.634975	0.625	0.829
hMG2	Zfhx3	4.4947e-08	1.44743e-12	0.634908	0.758	0.874
hMG2	Srrm2	5.44609e-11	1.7538e-15	0.629833	0.797	0.947
hMG2	Cd84	1	0.000644705	0.629027	0.633	0.871
hMG2	Neat1	1	0.00115729	0.628172	0.602	0.705
hMG2	Myh9	0.000457989	1.47486e-08	0.621214	0.68	0.855
hMG2	Srsf10	1	0.000285977	0.618442	0.562	0.77
hMG2	Celf2	6.70404e-05	2.1589e-09	0.615215	0.703	0.887
hMG2	Apbb1ip	1.31933e-06	4.24865e-11	0.612002	0.75	0.915
hMG2	Tnrc6a	1	8.93922e-05	0.611657	0.57	0.765
hMG2	Cd180	1.28602e-05	4.14138e-10	0.609095	0.773	0.888
hMG2	Fgd2	8.98208e-07	2.8925e-11	0.607434	0.68	0.818
hMG2	Akap13	1.96751e-07	6.33596e-12	0.605579	0.75	0.912
hMG2	Ikzf1	1	0.00787863	0.598582	0.57	0.83
hMG2	Qk	5.36077e-05	1.72633e-09	0.595688	0.719	0.888
hMG2	Cflar	1	0.000635997	0.585332	0.57	0.809
hMG2	Acin1	0.402422	1.29592e-05	0.573612	0.617	0.843
hMG2	Hk2	0.000733858	2.36324e-08	0.565347	0.797	0.926
hMG2	Klf6	0.0515993	1.66165e-06	0.563063	0.789	0.902
hMG2	Inpp5d	1.74894e-08	5.63213e-13	0.56206	0.781	0.891
hMG2	Dock2	1	0.000232127	0.557294	0.586	0.819
hMG2	Itgb5	1.09316e-06	3.52031e-11	0.556478	0.891	0.959
hMG2	Zfp445	1	0.00687203	0.555613	0.297	0.609
hMG2	Exosc2	0.310931	1.00129e-05	0.550044	0.195	0.497
hMG2	Pwwp2a	1	0.00707526	0.54993	0.266	0.543
hMG2	Zfp36l2	1	0.000121835	0.549239	0.648	0.871
hMG2	Ncor1	1	0.000178945	0.544726	0.594	0.824
hMG2	Plxnb2	1	0.000798369	0.539191	0.594	0.829
hMG2	Skap2	1	0.000551968	0.537793	0.602	0.868
hMG2	Pid1	1	0.000545935	0.53631	0.211	0.478
hMG2	Sf3b1	0.00482686	1.55439e-07	0.535417	0.734	0.929
hMG2	Brd2	1	0.00381757	0.53341	0.609	0.856
hMG2	Pou2f2	1	6.7286e-05	0.529321	0.703	0.862
hMG2	Nhlrc3	1	0.00384528	0.528627	0.25	0.519
hMG2	Prrc2c	1	0.000153063	0.527203	0.609	0.843
hMG2	Gm26740	1	0.00337216	0.52423	0.234	0.489
hMG2	Polr1a	1	0.0033611	0.523267	0.234	0.489
hMG2	Ier5	1	0.000688275	0.521614	0.641	0.869
hMG2	Trio	1	0.00454227	0.52087	0.281	0.582
hMG2	Tssc4	1	0.00563617	0.520848	0.273	0.564
hMG2	Ifi204	1	0.000816396	0.518993	0.672	0.889
hMG2	Ptbp3	1	3.82149e-05	0.514427	0.688	0.892
hMG2	Cdc37l1	1	0.00431194	0.507625	0.227	0.469
hMG2	Zdhhc21	1	0.00572874	0.507443	0.281	0.581
hMG2	Rabgap1	1	0.00810846	0.5021	0.211	0.425
hMG2	Pgap1	1	0.00342199	0.501986	0.195	0.412
hMG2	Arid2	1	0.00527267	0.498918	0.242	0.499
hMG2	Kdm6b	1	0.000647971	0.498254	0.266	0.578
hMG2	Fmr1	1	0.00981053	0.49761	0.266	0.534
hMG2	Rsf1	1	0.0039825	0.496628	0.289	0.606
hMG2	Plxdc2	1	0.000129144	0.495215	0.641	0.887
hMG2	Topbp1	1	0.00445828	0.495105	0.242	0.501
hMG2	Itga6	1	0.000375105	0.49438	0.602	0.844
hMG2	Ckap5	1	0.000988282	0.492678	0.195	0.436
hMG2	Cdc40	1	0.00439915	0.489076	0.258	0.533
hMG2	Pou2f1	1	0.0099234	0.485699	0.195	0.389
hMG2	Cyth4	0.0194959	6.27826e-07	0.485398	0.742	0.933
hMG2	Trim30a	1	0.000187554	0.484432	0.625	0.841
hMG2	Tbc1d5	1	0.00680399	0.481287	0.273	0.558
hMG2	Zbtb20	1	4.77074e-05	0.479083	0.203	0.5
hMG2	Upf2	1	0.00824983	0.478419	0.289	0.587
hMG2	Tcf25	1	0.00961532	0.477853	0.562	0.825
hMG2	Kri1	1	0.000965444	0.475675	0.195	0.437
hMG2	Eif2s3y	1	6.46299e-05	0.475613	0.281	0.665
hMG2	Nup214	1	0.00162832	0.474778	0.234	0.508
hMG2	Ints9	1	0.00983738	0.470971	0.234	0.467
hMG2	Ddx60	1	0.00043364	0.470815	0.148	0.357
hMG2	Tnfsf8	1	0.00680989	0.47023	0.188	0.38
hMG2	Anapc1	1	0.00539292	0.468757	0.242	0.499
hMG2	Ireb2	1	0.00924081	0.468615	0.25	0.502
hMG2	Ppip5k2	1	0.00180821	0.468273	0.203	0.441
hMG2	Ankrd12	1	0.000251577	0.468096	0.258	0.581
hMG2	Tango2	1	0.00366131	0.468005	0.242	0.506
hMG2	Chkb	1	0.00044454	0.466259	0.188	0.435
hMG2	Lmln	1	0.00575066	0.458256	0.203	0.416
hMG2	Slc1a3	1	0.00865949	0.457747	0.328	0.666
hMG2	Emsy	1	0.00668088	0.457413	0.234	0.475
hMG2	2610507B11Rik	1	0.00399239	0.456596	0.297	0.626
hMG2	Mysm1	1	0.00407004	0.456248	0.266	0.552
hMG2	Xpo6	1	0.0051033	0.454871	0.281	0.584
hMG2	Metap1d	1	0.00771029	0.454584	0.195	0.394
hMG2	Kansl3	1	0.000656305	0.453937	0.203	0.457
hMG2	Tubgcp4	1	0.00140876	0.450569	0.188	0.413
hMG2	Klf10	1	0.00100833	0.450265	0.258	0.562
hMG2	Ylpm1	1	0.00942484	0.448286	0.25	0.5
hMG2	Pcf11	1	0.000450049	0.448013	0.266	0.598
hMG2	Prr5l	1	0.00123253	0.446653	0.297	0.642
hMG2	Tap1	1	0.00879153	0.444537	0.648	0.93
hMG2	Tbc1d23	1	0.00822109	0.444523	0.281	0.574
hMG2	Fam76b	1	0.000988186	0.443319	0.242	0.533
hMG2	Ap2a2	1	0.000811204	0.44065	0.258	0.572
hMG2	Usp47	1	0.0092749	0.440244	0.25	0.499
hMG2	Chd4	1	0.000829371	0.440226	0.633	0.861
hMG2	Taf7	1	0.00603421	0.440225	0.266	0.543
hMG2	Mgat5	1	0.000667775	0.439998	0.25	0.558
hMG2	Prune2	1	0.000371907	0.439986	0.234	0.535
hMG2	Rictor	1	7.27607e-05	0.437984	0.211	0.512
hMG2	Spen	1	0.00128461	0.437971	0.219	0.478
hMG2	Srrt	1	0.00359329	0.437893	0.289	0.609
hMG2	Foxj3	1	0.00142327	0.436452	0.148	0.339
hMG2	Zfp652	1	0.000535818	0.436397	0.258	0.577
hMG2	Gm4070	1	0.00337931	0.435918	0.188	0.396
hMG2	Arid4b	1	0.00826858	0.435439	0.289	0.588
hMG2	Uhrf1bp1	1	0.00768444	0.435357	0.258	0.52
hMG2	Nemf	1	0.0047392	0.435105	0.305	0.634
hMG2	Rest	1	0.000138985	0.435033	0.219	0.518
hMG2	Sbf1	1	0.00304574	0.43394	0.172	0.369
hMG2	Slc4a7	1	0.000151537	0.433607	0.258	0.6
hMG2	Lig1	1	0.00349219	0.4321	0.227	0.463
hMG2	Rb1cc1	1	0.00285004	0.432058	0.242	0.506
hMG2	Ptbp2	1	0.00682611	0.430957	0.203	0.412
hMG2	Ano6	1	0.00308511	0.429779	0.164	0.354
hMG2	Arih2	1	0.00238808	0.429162	0.219	0.464
hMG2	Trip11	1	0.007811	0.429109	0.297	0.605
hMG2	Vti1a	1	0.00135326	0.428573	0.18	0.4
hMG2	Ppp1r12c	1	0.00196239	0.428332	0.297	0.636
hMG2	Exoc4	1	0.00818	0.428249	0.242	0.483
hMG2	Eef2k	1	0.00286412	0.427696	0.219	0.462
hMG2	Rrbp1	9.82151e-10	3.16282e-14	0.427663	0.992	0.974
hMG2	Rbm33	1	0.0040666	0.427408	0.227	0.47
hMG2	Tbc1d1	1	0.0018639	0.427265	0.25	0.537
hMG2	Rc3h2	1	0.00609478	0.427018	0.25	0.511
hMG2	Rapgef2	1	0.00157444	0.426938	0.203	0.438
hMG2	Arhgap39	0.927286	2.98614e-05	0.425964	0.219	0.545
hMG2	Zranb1	1	0.00456319	0.425554	0.258	0.531
hMG2	Swt1	1	0.000748457	0.4253	0.242	0.54
hMG2	Parp1	1	8.94543e-05	0.42487	0.289	0.673
hMG2	Tgfbrap1	1	0.000340054	0.424226	0.211	0.487
hMG2	Phkb	1	0.00407019	0.42399	0.164	0.348
hMG2	Mecp2	0.936793	3.01675e-05	0.423471	0.188	0.48
hMG2	Rgl2	1	5.01791e-05	0.423149	0.219	0.537
hMG2	Chfr	1	0.00738536	0.423013	0.242	0.49
hMG2	Anxa3	0.607427	1.9561e-05	0.422618	0.781	0.93
hMG2	Eya4	1	0.00019336	0.422536	0.164	0.403
hMG2	Atg16l1	1	0.000506605	0.421945	0.203	0.465
hMG2	Ccdc174	1	3.58566e-05	0.421307	0.25	0.607
hMG2	Rsbn1	1	0.000221787	0.42036	0.211	0.494
hMG2	Cdk8	1	0.000977104	0.420133	0.25	0.551
hMG2	Uba7	1	6.24156e-05	0.42012	0.258	0.613
hMG2	Pld1	1	0.000958832	0.420013	0.281	0.619
hMG2	Sipa1l1	1	0.00401562	0.419824	0.219	0.453
hMG2	Slco2b1	1	0.00303291	0.419674	0.688	0.888
hMG2	Rcsd1	1	0.000965967	0.419477	0.273	0.59
hMG2	Tm6sf1	1	0.00395314	0.419414	0.312	0.648
hMG2	Etv3	1	0.00918209	0.419264	0.328	0.671
hMG2	Apbb2	1	0.000357592	0.419166	0.227	0.519
hMG2	Hook3	1	0.00624813	0.418623	0.32	0.659
hMG2	Tmco3	1	0.000650266	0.418359	0.211	0.476
hMG2	Casp8ap2	1	0.00290091	0.418158	0.227	0.476
hMG2	Trim35	1	0.00131988	0.417635	0.297	0.65
hMG2	Arhgap31	1	0.00632031	0.416435	0.297	0.611
hMG2	Cd86	0.974045	3.13672e-05	0.415443	0.672	0.886
hMG2	Pml	1	0.000537359	0.415266	0.219	0.494
hMG2	Ttc7	1	0.000864316	0.415225	0.211	0.469
hMG2	Fam208a	1	4.44109e-05	0.415117	0.211	0.518
hMG2	Dock8	1	0.00103885	0.414156	0.289	0.641
hMG2	Hsf1	1	0.00271187	0.413401	0.219	0.46
hMG2	Tmem168	1	0.00408901	0.413354	0.305	0.636
hMG2	Pdzd8	1	0.00168319	0.41318	0.203	0.442
hMG2	E2f3	1	0.00237907	0.413066	0.227	0.481
hMG2	Med13	1	3.56914e-05	0.412544	0.195	0.493
hMG2	Ppp1r15b	1	0.00550133	0.411951	0.297	0.619
hMG2	Fnip1	1	0.00117975	0.410867	0.281	0.611
hMG2	Nrd1	1	0.00300091	0.409254	0.32	0.68
hMG2	Amd2	1	0.000777281	0.409163	0.219	0.485
hMG2	Impact	1	0.0040085	0.408097	0.242	0.498
hMG2	Abca3	1	0.000312175	0.407898	0.289	0.648
hMG2	Baz2b	1	0.00148417	0.407834	0.273	0.591
hMG2	Cep250	1	0.00113338	0.407526	0.219	0.48
hMG2	Braf	1	0.00212162	0.407401	0.219	0.469
hMG2	Myo9a	1	0.00234843	0.407308	0.219	0.467
hMG2	Fnbp1	1	0.000301598	0.407262	0.289	0.66
hMG2	Prkca	1	0.00182281	0.406861	0.18	0.393
hMG2	Pofut1	1	0.00364257	0.406667	0.211	0.442
hMG2	Dot1l	1	0.00217503	0.406584	0.203	0.435
hMG2	Zfp106	1	0.00145402	0.406424	0.312	0.685
hMG2	Tcf12	1	0.00162147	0.406172	0.242	0.519
hMG2	Atad2b	1	0.00705463	0.406162	0.258	0.519
hMG2	Ubn1	1	0.000406312	0.405777	0.297	0.674
hMG2	Ccr5	1	0.00328151	0.405659	0.672	0.884
hMG2	Slf2	1	0.00573285	0.405526	0.242	0.495
hMG2	9930021J03Rik	1	0.00114296	0.404777	0.18	0.402
hMG2	Ldb1	1	0.00296467	0.404534	0.289	0.609
hMG2	Taok2	1	0.000262886	0.404063	0.219	0.504
hMG2	Atp9b	1	0.00506404	0.403981	0.234	0.481
hMG2	Mllt10	1	4.06773e-05	0.403911	0.211	0.524
hMG2	Cop1	1	0.000691237	0.402422	0.266	0.591
hMG2	Mtf2	1	0.000633323	0.402328	0.219	0.492
hMG2	Ldah	1	0.000439921	0.402317	0.188	0.435
hMG2	Fto	1	0.00615706	0.402247	0.234	0.479
hMG2	Amn1	1	0.00103319	0.402152	0.172	0.386
hMG2	Pik3r6	1	0.00188185	0.402032	0.211	0.455
hMG2	Spred1	1	0.00201323	0.401786	0.273	0.587
hMG2	Dusp16	1	0.00228772	0.400989	0.172	0.373
hMG2	Usp36	1	0.000752804	0.400635	0.25	0.555
hMG2	Clcn3	1	9.48828e-05	0.400585	0.219	0.522
hMG2	Herc4	0.763688	2.4593e-05	0.400538	0.18	0.467
hMG2	Kif1b	1	0.00336331	0.399294	0.234	0.489
hMG2	Dna2	1	0.00172798	0.398347	0.266	0.572
hMG2	Zfp157	1	0.0037708	0.397664	0.148	0.322
hMG2	Slc4a2	1	0.0021074	0.397507	0.18	0.391
hMG2	Sh3bp2	1	0.00723632	0.396123	0.312	0.644
hMG2	Angel2	1	0.000131462	0.395756	0.242	0.566
hMG2	Ralgps2	1	0.000126124	0.395585	0.156	0.395
hMG2	Pld4	0.212746	6.85105e-06	0.395544	0.867	0.964
hMG2	Slc16a10	1	0.00194508	0.394816	0.219	0.47
hMG2	Hnrnpu	1	0.000294384	0.394739	0.633	0.905
hMG2	Tmem87b	1	0.00039561	0.394577	0.234	0.532
hMG2	4833420G17Rik	0.776963	2.50205e-05	0.394564	0.195	0.497
hMG2	Adap2os	1	0.000264665	0.394419	0.18	0.426
hMG2	Cep164	1	3.76009e-05	0.39427	0.148	0.398
hMG2	Matr3	0.380123	1.22411e-05	0.393557	0.273	0.678
hMG2	Nek9	1	9.27867e-05	0.393515	0.141	0.369
hMG2	Fxr2	1	9.75221e-05	0.393489	0.164	0.414
hMG2	Armc5	1	0.0056505	0.392295	0.32	0.668
hMG2	Gcn1l1	1	0.00195229	0.391701	0.266	0.569
hMG2	Zfc3h1	1	0.000784061	0.391554	0.18	0.407
hMG2	Tmem65	1	0.00998171	0.391489	0.203	0.402
hMG2	Lrrc8d	1	0.000196123	0.391459	0.258	0.597
hMG2	Mapk8	1	0.00151041	0.391432	0.156	0.352
hMG2	Hist1h1e	1	3.82954e-05	0.390381	0.188	0.469
hMG2	Bdp1	1	0.000611383	0.390271	0.242	0.54
hMG2	Nup153	1	0.00085756	0.390199	0.234	0.516
hMG2	Xpr1	1	0.00250266	0.389909	0.25	0.529
hMG2	Cdc73	1	0.000559837	0.389384	0.227	0.507
hMG2	Dlg1	1	0.000701818	0.389264	0.133	0.322
hMG2	Eri1	1	0.000229969	0.389223	0.203	0.474
hMG2	Anks1	1	0.000527457	0.388784	0.133	0.325
hMG2	Cpsf6	0.646325	2.08136e-05	0.388693	0.25	0.618
hMG2	Stxbp5	1	0.000130447	0.388292	0.164	0.409
hMG2	Vps13a	1	0.00113102	0.387466	0.18	0.402
hMG2	Atf7	1	0.00154085	0.38558	0.219	0.475
hMG2	Klf4	1	0.00262985	0.385134	0.25	0.511
hMG2	Morc2a	1	0.0017915	0.38456	0.133	0.307
hMG2	Zmynd11	1	0.0014977	0.384482	0.289	0.629
hMG2	Ago1	0.183602	5.91252e-06	0.383164	0.188	0.504
hMG2	Kmt2d	1	0.00463338	0.383054	0.211	0.435
hMG2	Arid4a	1	0.00898189	0.38263	0.312	0.638
hMG2	Zbtb18	1	8.32273e-05	0.382573	0.227	0.543
hMG2	Fam193a	1	0.0026738	0.382303	0.281	0.595
hMG2	Bcl2	1	0.00377926	0.382259	0.172	0.363
hMG2	Col27a1	1	0.000337035	0.382217	0.211	0.483
hMG2	Rpap1	0.018118	5.83455e-07	0.381949	0.047	0.258
hMG2	Furin	1	0.000328678	0.381425	0.266	0.605
hMG2	Trmt1l	1	7.81956e-05	0.381138	0.219	0.531
hMG2	Ptpn1	0.000417608	1.34482e-08	0.381085	0.797	0.949
hMG2	Swap70	0.823587	2.6522e-05	0.380988	0.156	0.416
hMG2	Wdr44	1	8.41753e-05	0.380877	0.188	0.463
hMG2	Mga	1	0.00193535	0.380678	0.25	0.534
hMG2	Dhx30	1	0.00211166	0.380527	0.219	0.468
hMG2	Taf3	1	0.00261001	0.380254	0.195	0.417
hMG2	Lrch1	1	0.00146153	0.379821	0.219	0.476
hMG2	Cyth3	1	6.53926e-05	0.379685	0.172	0.436
hMG2	Rangap1	1	0.00382043	0.379555	0.258	0.529
hMG2	Tnrc18	1	0.000118474	0.378917	0.258	0.609
hMG2	Casp4	1	0.00158801	0.378472	0.281	0.604
hMG2	Zzz3	1	0.000905717	0.377824	0.234	0.517
hMG2	Atm	1	0.00100226	0.377246	0.156	0.36
hMG2	Fkbp15	1	0.00211998	0.377139	0.32	0.686
hMG2	Rbm47	1	0.00131382	0.376749	0.281	0.611
hMG2	Ttyh3	1	0.000879668	0.376711	0.32	0.701
hMG2	Hirip3	1	0.00802247	0.376326	0.211	0.419
hMG2	Odc1	1	0.000123778	0.375736	0.281	0.654
hMG2	Epc1	1	0.00166056	0.375495	0.281	0.605
hMG2	Tnrc6b	1	0.00207822	0.375316	0.305	0.655
hMG2	Rexo1	0.0948215	3.05354e-06	0.375261	0.195	0.531
hMG2	Gcc2	1	0.000229228	0.374786	0.234	0.542
hMG2	Sel1l	1	0.000244607	0.374676	0.281	0.646
hMG2	Zfp398	1	0.00212289	0.374625	0.211	0.449
hMG2	Tns1	0.589417	1.8981e-05	0.3746	0.195	0.503
hMG2	Lair1	0.338403	1.08976e-05	0.37432	0.867	0.956
hMG2	Nf1	1	5.18842e-05	0.374299	0.211	0.519
hMG2	Ythdf3	1	0.00365748	0.374267	0.242	0.504
hMG2	Gns	1	0.00155269	0.373696	0.719	0.912
hMG2	Rngtt	1	0.00575985	0.373679	0.164	0.342
hMG2	Pnpla7	1	0.000361378	0.373367	0.312	0.698
hMG2	Ap3d1	1	0.00155427	0.372863	0.305	0.66
hMG2	Ralgapa1	1	0.000190317	0.372578	0.156	0.388
hMG2	Phrf1	1	0.000354113	0.372321	0.203	0.469
hMG2	Orc4	1	0.000741623	0.372142	0.203	0.457
hMG2	Mx1	0.0165708	5.3363e-07	0.372043	0.148	0.452
hMG2	St3gal2	1	8.97936e-05	0.371917	0.156	0.4
hMG2	Rapgef6	1	0.00106188	0.371565	0.281	0.615
hMG2	Nup98	1	5.83578e-05	0.371498	0.219	0.533
hMG2	Espl1	1	0.000235387	0.371371	0.156	0.384
hMG2	Nrp2	1	0.000476865	0.371199	0.227	0.51
hMG2	Map3k3	1	0.00284699	0.371079	0.227	0.478
hMG2	Luzp1	1	0.000135823	0.370937	0.219	0.519
hMG2	Sgo1	1	0.00978743	0.370176	0.141	0.288
hMG2	Zfp451	1	0.000493777	0.369985	0.211	0.476
hMG2	Naa35	1	0.00112757	0.369974	0.297	0.652
hMG2	Dpm1	1	0.00256556	0.369186	0.312	0.668
hMG2	Abl1	1	7.68839e-05	0.369046	0.188	0.465
hMG2	Tgif1	1	0.00039459	0.368307	0.273	0.604
hMG2	Oas2	1	0.000254316	0.368154	0.172	0.414
hMG2	Arnt	0.838969	2.70173e-05	0.368017	0.164	0.433
hMG2	Man2a2	1	0.000272462	0.367909	0.203	0.473
hMG2	Smarca2	1	0.00029323	0.367828	0.234	0.538
hMG2	Cstf3	1	0.00506322	0.367779	0.172	0.358
hMG2	Mindy2	1	7.78855e-05	0.367275	0.273	0.643
hMG2	Med12l	1	3.5279e-05	0.36695	0.172	0.442
hMG2	Hmbox1	1	0.00134635	0.366892	0.203	0.446
hMG2	Nsmaf	1	0.000631817	0.366783	0.188	0.429
hMG2	Rbl1	1	0.00405095	0.366211	0.172	0.363
hMG2	Pla2g4a	1	0.000905913	0.366016	0.305	0.673
hMG2	Nfia	1	0.000203664	0.36591	0.258	0.59
hMG2	Wwc2	1	4.44395e-05	0.365132	0.234	0.57
hMG2	Atxn7	1	0.000407508	0.363822	0.195	0.451
hMG2	Mfap3	1	9.13839e-05	0.363215	0.25	0.595
hMG2	Aaed1	6.92251e-08	2.22925e-12	0.363119	0.07	0.43
hMG2	Arhgef40	0.287974	9.27364e-06	0.363049	0.203	0.529
hMG2	Cpeb2	1	0.000129784	0.363028	0.188	0.455
hMG2	Tle3	1	0.00150292	0.362934	0.227	0.49
hMG2	Golgb1	1	0.000135432	0.362321	0.273	0.629
hMG2	Ccdc50	1	0.000117785	0.362231	0.297	0.685
hMG2	Plk3	1	0.000192036	0.361871	0.266	0.608
hMG2	Fam133b	0.0878717	2.82973e-06	0.361668	0.234	0.614
hMG2	Chuk	1	0.000418303	0.361483	0.203	0.465
hMG2	Arhgap27	1	0.000179515	0.361372	0.242	0.561
hMG2	Sass6	1	0.00398059	0.361196	0.172	0.363
hMG2	Rhno1	1	0.0044208	0.361162	0.164	0.347
hMG2	Zfp871	1	0.00171457	0.361106	0.211	0.455
hMG2	Zrsr2	1	0.00742278	0.360382	0.297	0.609
hMG2	Rreb1	1	0.00376043	0.360203	0.297	0.616
hMG2	Sfmbt1	1	0.0029158	0.359484	0.234	0.492
hMG2	Zzef1	1	0.000171975	0.359388	0.227	0.533
hMG2	Extl3	1	6.98412e-05	0.359339	0.289	0.676
hMG2	Orai2	0.1882	6.06061e-06	0.359306	0.195	0.516
hMG2	Rhbdf2	0.902551	2.90649e-05	0.359187	0.195	0.496
hMG2	Gigyf2	1	0.000547255	0.35847	0.227	0.506
hMG2	Pfkfb4	0.0638321	2.05558e-06	0.358297	0.172	0.483
hMG2	Plpbp	0.286741	9.23392e-06	0.357998	0.234	0.591
hMG2	A630072M18Rik	1	0.00496435	0.357878	0.133	0.287
hMG2	Rbpms	0.0144175	4.64285e-07	0.357686	0.227	0.618
hMG2	Clcn7	1	0.000498927	0.357136	0.25	0.561
hMG2	Gtf3c2	1	0.000193868	0.357092	0.211	0.497
hMG2	Atr	1	0.000582984	0.356928	0.195	0.445
hMG2	Smarcc1	1	0.00013789	0.356731	0.234	0.548
hMG2	Zc3h18	1	0.000800919	0.356056	0.258	0.566
hMG2	Alkbh5	1	5.25573e-05	0.354715	0.227	0.551
hMG2	Smarcc2	1	0.000638876	0.354634	0.25	0.559
hMG2	Rbm4b	1	0.000754499	0.354429	0.188	0.425
hMG2	Pkd1	0.0239417	7.70994e-07	0.354146	0.156	0.467
hMG2	Iws1	1	0.000138837	0.353628	0.195	0.47
hMG2	Dcaf7	0.221629	7.13713e-06	0.353502	0.156	0.435
hMG2	Adar	1	7.56202e-05	0.352981	0.234	0.565
hMG2	Ensa	1	7.43931e-05	0.352779	0.25	0.597
hMG2	Pfkfb3	1	4.38944e-05	0.352409	0.258	0.624
hMG2	Camta2	1	0.000658188	0.352175	0.227	0.504
hMG2	Gigyf1	1	0.00049068	0.352114	0.211	0.476
hMG2	Smurf1	1	0.00147513	0.351604	0.125	0.296
hMG2	Dram2	1	0.0041746	0.351259	0.344	0.724
hMG2	Chd1	1	0.000493851	0.351234	0.258	0.577
hMG2	Dph5	0.342972	1.10447e-05	0.351112	0.18	0.474
hMG2	Tnpo2	1	0.00136767	0.350982	0.141	0.325
hMG2	Gps2	1	0.00044416	0.350968	0.305	0.687
hMG2	Pspc1	1	0.00685694	0.35014	0.211	0.426
hMG2	Usp9x	1	0.00443815	0.349706	0.281	0.584
hMG2	Ehmt2	1	0.000245562	0.349603	0.234	0.538
hMG2	Rhob	1	0.000178709	0.349591	0.844	0.911
hMG2	Chd8	1	9.7525e-05	0.348354	0.266	0.627
hMG2	Lrif1	1	9.72635e-05	0.34818	0.211	0.508
hMG2	Nuak2	1	7.00008e-05	0.348113	0.219	0.529
hMG2	Klf3	1	0.00012951	0.348053	0.32	0.733
hMG2	Stam2	1	7.3095e-05	0.347943	0.164	0.417
hMG2	Zc3h4	1	0.000188672	0.347825	0.172	0.419
hMG2	Ppwd1	1	0.000287718	0.347817	0.242	0.556
hMG2	Gbp9	1	0.000671264	0.347571	0.188	0.425
hMG2	Rnf111	1	0.00835539	0.347286	0.312	0.638
hMG2	Lrp5	1	0.000913114	0.347206	0.18	0.407
hMG2	Tmem87a	1	0.00195817	0.347203	0.18	0.393
hMG2	Parp8	0.742656	2.39157e-05	0.347147	0.188	0.483
hMG2	Arhgap24	0.465	1.49744e-05	0.346428	0.211	0.538
hMG2	Tia1	1	0.000136454	0.346362	0.25	0.587
hMG2	Eea1	1	0.000811324	0.346044	0.219	0.485
hMG2	Rfwd3	1	0.00390581	0.345664	0.148	0.319
hMG2	Cdip1	0.00630988	2.03197e-07	0.345402	0.156	0.484
hMG2	Ppp4r3b	1	0.000100459	0.345311	0.273	0.643
hMG2	Slc9a9	0.280217	9.02382e-06	0.345249	0.219	0.563
hMG2	Pi4k2a	1	0.000111144	0.344948	0.266	0.621
hMG2	Myo1c	0.00393831	1.26826e-07	0.344459	0.156	0.489
hMG2	Zcchc8	1	0.000366703	0.344345	0.203	0.468
hMG2	Ddx46	1	0.000169096	0.343634	0.273	0.63
hMG2	Eif4enif1	0.448146	1.44317e-05	0.343536	0.156	0.426
hMG2	Rapgef1	1	0.000482524	0.343229	0.234	0.526
hMG2	Akap10	1	0.00922447	0.343201	0.188	0.374
hMG2	Setdb1	1	0.000309026	0.342937	0.195	0.457
hMG2	Med13l	1	6.54459e-05	0.342841	0.258	0.606
hMG2	Tbc1d9	1	9.7658e-05	0.341974	0.25	0.593
hMG2	Msl1	1	3.44827e-05	0.341901	0.25	0.608
hMG2	Lztfl1	1	0.00128809	0.341863	0.195	0.428
hMG2	Bcl7a	1	0.00371962	0.34182	0.156	0.336
hMG2	Trmt1	1	0.000479652	0.341459	0.258	0.577
hMG2	Cnot6	1	0.000273672	0.341435	0.242	0.556
hMG2	Cds1	0.20938	6.74266e-06	0.341407	0.172	0.467
hMG2	Ddx5	0.00222384	7.16144e-08	0.340858	0.977	0.99
hMG2	Trim34a	1	8.42397e-05	0.340654	0.164	0.415
hMG2	Atp13a1	1	4.55706e-05	0.340358	0.258	0.625
hMG2	Prkd3	1	0.000104822	0.340093	0.219	0.521
hMG2	BC037034	0.48756	1.57009e-05	0.339987	0.289	0.708
hMG2	Myo1e	1	0.000254641	0.339676	0.266	0.608
hMG2	Galnt11	0.717396	2.31023e-05	0.339516	0.219	0.549
hMG2	Spopl	1	0.00180392	0.33927	0.172	0.378
hMG2	Gsdme	1	0.000518835	0.33915	0.125	0.313
hMG2	Erbin	1	4.78964e-05	0.338543	0.242	0.583
hMG2	Sf1	1	0.000421531	0.338444	0.312	0.697
hMG2	Rab11fip5	0.521983	1.68094e-05	0.337213	0.195	0.501
hMG2	Fgd4	1	0.000119258	0.337135	0.164	0.409
hMG2	Uggt1	1	0.00409997	0.33713	0.297	0.615
hMG2	Rnf169	1	0.000638406	0.336439	0.172	0.398
hMG2	Tmem170b	1	0.000776939	0.33594	0.188	0.424
hMG2	Synrg	1	0.000461614	0.335883	0.258	0.581
hMG2	Mon2	0.665423	2.14286e-05	0.335835	0.211	0.532
hMG2	Mitf	1	0.00253195	0.335648	0.172	0.371
hMG2	Ikbkb	1	7.24538e-05	0.335509	0.266	0.626
hMG2	Cyld	0.141774	4.56556e-06	0.335074	0.234	0.606
hMG2	Supt5	1	0.00110262	0.33503	0.305	0.659
hMG2	Vkorc1l1	1	0.00207363	0.33436	0.172	0.377
hMG2	Fam102b	1	0.00270847	0.334188	0.328	0.692
hMG2	Chd3	1	0.000223243	0.334166	0.156	0.384
hMG2	Creb5	0.0305495	9.83784e-07	0.333661	0.125	0.401
hMG2	Usp35	1	0.00290217	0.333333	0.148	0.327
hMG2	Atp6v1h	0.297337	9.57516e-06	0.333306	0.242	0.613
hMG2	Timeless	1	0.00648728	0.333237	0.141	0.297
hMG2	Zfp407	1	0.00790824	0.333181	0.156	0.32
hMG2	Spire1	0.256264	8.25248e-06	0.333114	0.219	0.565
hMG2	Lrch3	1	0.0011598	0.333038	0.203	0.447
hMG2	Zkscan3	0.426294	1.3728e-05	0.331479	0.219	0.557
hMG2	Zranb2	0.0250387	8.06321e-07	0.331415	0.258	0.676
hMG2	Vars	1	0.000480418	0.331396	0.289	0.645
hMG2	Wdfy2	1	0.000163356	0.331093	0.203	0.483
hMG2	Crlf3	1	0.000834936	0.330992	0.32	0.701
hMG2	Smarcad1	1	0.000814156	0.330386	0.211	0.471
hMG2	Tbc1d9b	1	0.00017222	0.330332	0.211	0.497
hMG2	Clk3	0.213407	6.87234e-06	0.330255	0.195	0.518
hMG2	Dalrd3	0.666695	2.14696e-05	0.330148	0.18	0.467
hMG2	Gapvd1	0.735656	2.36903e-05	0.33005	0.273	0.668
hMG2	Tbc1d14	1	0.000142531	0.329984	0.281	0.648
hMG2	Spata2	1	0.000382524	0.329617	0.156	0.377
hMG2	Dennd1a	1	0.000729455	0.3295	0.188	0.426
hMG2	Dnm1l	1	0.000228181	0.329492	0.258	0.594
hMG2	Zfyve27	1	8.5875e-05	0.329249	0.156	0.4
hMG2	Dpy19l4	1	7.51549e-05	0.329096	0.281	0.668
hMG2	Ncl	1	0.000237832	0.329075	0.812	0.948
hMG2	Parp12	0.124025	3.99397e-06	0.328778	0.258	0.659
hMG2	Prrc2a	1	0.00729235	0.328739	0.336	0.699
hMG2	Gbf1	0.0302973	9.75665e-07	0.328507	0.172	0.497
hMG2	Fryl	1	0.00065376	0.327868	0.211	0.473
hMG2	Top3b	1	0.000102867	0.327809	0.156	0.397
hMG2	Wac	1	4.13634e-05	0.327633	0.297	0.7
hMG2	Pdcd11	1	0.00043017	0.327548	0.273	0.609
hMG2	Tmem164	1	0.000489521	0.32735	0.148	0.357
hMG2	Gon4l	0.247076	7.9566e-06	0.327088	0.219	0.563
hMG2	Atp7a	1	3.42791e-05	0.326854	0.227	0.553
hMG2	Aff1	1	0.000197845	0.326432	0.148	0.372
hMG2	Ubr3	1	0.000149441	0.326391	0.172	0.419
hMG2	Senp1	0.42978	1.38402e-05	0.326357	0.164	0.444
hMG2	Brpf1	0.00493121	1.588e-07	0.326246	0.195	0.57
hMG2	Ganc	1	7.49014e-05	0.326111	0.133	0.357
hMG2	Wwox	1	0.00160606	0.324752	0.133	0.309
hMG2	Uso1	1	5.16604e-05	0.32471	0.227	0.548
hMG2	Fam126b	1	0.00795785	0.32446	0.148	0.308
hMG2	Fbxo3	1	0.000181318	0.32415	0.18	0.434
hMG2	Oxa1l	0.000956435	3.08001e-08	0.324136	0.211	0.625
hMG2	Sltm	1	0.00406778	0.324061	0.344	0.728
hMG2	Cdk5rap2	1	0.00989245	0.323706	0.125	0.262
hMG2	Hnrnpr	1	9.29944e-05	0.323155	0.273	0.641
hMG2	Ist1	0.056836	1.83029e-06	0.322991	0.242	0.639
hMG2	Slc9a8	0.935821	3.01363e-05	0.322748	0.164	0.432
hMG2	Akap8l	1	0.00125146	0.322693	0.281	0.61
hMG2	Vps54	0.553641	1.78289e-05	0.321866	0.211	0.535
hMG2	Adrb2	0.361986	1.1657e-05	0.321652	0.18	0.474
hMG2	Nbeal1	1	3.38308e-05	0.321112	0.172	0.446
hMG2	Pikfyve	1	7.56794e-05	0.320945	0.172	0.43
hMG2	Arih1	0.0841228	2.70901e-06	0.320895	0.227	0.593
hMG2	4931406P16Rik	0.0803382	2.58713e-06	0.320783	0.18	0.496
hMG2	Jarid2	1	0.00106363	0.320727	0.148	0.344
hMG2	Msl2	1	0.000175129	0.320689	0.203	0.48
hMG2	Brd1	1	3.81646e-05	0.320171	0.227	0.554
hMG2	Nom1	1	0.000296537	0.319699	0.195	0.457
hMG2	Znrf2	1	0.000216579	0.319608	0.273	0.623
hMG2	Acsl4	0.711173	2.29019e-05	0.319019	0.258	0.634
hMG2	Ggnbp2	1	0.00166174	0.318994	0.344	0.753
hMG2	Ezh2	1	7.60805e-05	0.318785	0.188	0.458
hMG2	Wasl	1	0.000125681	0.3184	0.156	0.395
hMG2	Mid1	1	0.00015371	0.317976	0.164	0.405
hMG2	Dis3l2	1	0.000242305	0.317721	0.125	0.325
hMG2	Kansl1l	1	0.00115611	0.317551	0.156	0.357
hMG2	Slc44a2	0.0110877	3.57057e-07	0.317411	0.164	0.492
hMG2	Dopey2	0.02614	8.41788e-07	0.317166	0.188	0.53
hMG2	Amz1	0.0242958	7.82397e-07	0.31697	0.203	0.565
hMG2	4930503L19Rik	1	0.00166174	0.316934	0.125	0.293
hMG2	Tln2	0.433392	1.39565e-05	0.316674	0.172	0.455
hMG2	Apobr	0.555868	1.79006e-05	0.316377	0.164	0.435
hMG2	Plagl2	0.139796	4.50186e-06	0.316286	0.195	0.523
hMG2	Nfrkb	1	0.00632556	0.31606	0.211	0.427
hMG2	Aars	0.0778195	2.50602e-06	0.315397	0.273	0.699
hMG2	Med22	0.0277817	8.94654e-07	0.315185	0.234	0.625
hMG2	Acbd5	0.000162797	5.24256e-09	0.314756	0.18	0.571
hMG2	Nsun6	1	0.000320908	0.314283	0.125	0.32
hMG2	Slc38a6	1	0.000110697	0.314183	0.164	0.41
hMG2	Cnot7	1	0.000174576	0.314171	0.195	0.465
hMG2	Mapk8ip3	0.191242	6.15855e-06	0.313361	0.148	0.421
hMG2	Osbpl11	1	5.23807e-05	0.313266	0.242	0.587
hMG2	5031425E22Rik	0.174892	5.63204e-06	0.313185	0.18	0.484
hMG2	Kat6a	1	0.00254614	0.313165	0.273	0.577
hMG2	Tardbp	0.628127	2.02276e-05	0.312984	0.273	0.669
hMG2	Hps5	0.13092	4.21603e-06	0.312965	0.148	0.428
hMG2	Sfswap	0.27941	8.99785e-06	0.312704	0.211	0.542
hMG2	Pcsk7	1	3.55647e-05	0.31265	0.172	0.445
hMG2	Zfp646	1	0.00572946	0.312391	0.141	0.3
hMG2	Cnot3	1	0.00211768	0.31173	0.312	0.671
hMG2	Ankrd10	0.00416283	1.34055e-07	0.311663	0.18	0.538
hMG2	Ccnt1	0.00799742	2.57541e-07	0.31135	0.211	0.597
hMG2	Ttc3	1	6.1921e-05	0.311343	0.172	0.435
hMG2	Kdm3a	0.360339	1.1604e-05	0.311179	0.148	0.414
hMG2	Sugp2	1	0.00169888	0.311066	0.148	0.336
hMG2	Bicd2	0.0419491	1.35089e-06	0.311002	0.203	0.551
hMG2	Ctbp2	0.139167	4.48159e-06	0.310405	0.203	0.539
hMG2	Rprd1b	1	0.000298513	0.310002	0.164	0.396
hMG2	Acsl1	1	0.00100706	0.309969	0.266	0.575
hMG2	Btg1	1	0.00233119	0.309938	0.812	0.96
hMG2	Rc3h1	0.160041	5.1538e-06	0.309428	0.227	0.588
hMG2	Scaper	1	0.00475081	0.309043	0.117	0.262
hMG2	Ccrl2	0.36045	1.16076e-05	0.308999	0.258	0.619
hMG2	Txndc11	1	0.000378406	0.30898	0.203	0.468
hMG2	Tep1	1	3.25592e-05	0.308783	0.266	0.645
hMG2	Lifr	0.467635	1.50592e-05	0.308694	0.188	0.485
hMG2	3110043O21Rik	0.123791	3.98643e-06	0.30869	0.172	0.473
hMG2	Pcnx	1	0.000675818	0.30844	0.141	0.336
hMG2	Zfp292	1	0.000324923	0.308401	0.273	0.614
hMG2	Gmfb	1	6.23678e-05	0.307829	0.25	0.594
hMG2	Dcaf8	0.395201	1.27267e-05	0.307568	0.258	0.644
hMG2	Srpk1	1	3.6129e-05	0.307397	0.234	0.573
hMG2	Thumpd3	0.0014322	4.61211e-08	0.306959	0.148	0.487
hMG2	Cep170	0.0494052	1.591e-06	0.306948	0.195	0.533
hMG2	Rab8b	1	0.000383749	0.306806	0.336	0.748
hMG2	Crtc3	0.164833	5.30812e-06	0.306745	0.156	0.441
hMG2	Kat2b	1	5.42097e-05	0.306571	0.141	0.377
hMG2	Il17ra	1	0.0025261	0.306457	0.32	0.667
hMG2	Vav2	0.324035	1.04349e-05	0.306437	0.172	0.459
hMG2	Cars2	0.480211	1.54642e-05	0.306404	0.156	0.426
hMG2	Hmgxb4	1	0.000255708	0.305687	0.164	0.397
hMG2	Zfp410	1	0.000298734	0.304853	0.141	0.35
hMG2	Pja2	1	4.32566e-05	0.304832	0.164	0.424
hMG2	Rbm7	1	7.59418e-05	0.304826	0.289	0.677
hMG2	Kpnb1	1	8.81546e-05	0.304756	0.305	0.712
hMG2	Fbxw7	0.640028	2.06108e-05	0.304454	0.172	0.451
hMG2	Piezo1	0.0396329	1.2763e-06	0.304227	0.156	0.458
hMG2	Xpo1	1	0.000658327	0.3041	0.25	0.553
hMG2	Heatr6	0.0683078	2.19972e-06	0.30401	0.18	0.499
hMG2	Noc3l	1	0.00414182	0.303838	0.117	0.263
hMG2	Trmt10a	0.00450761	1.45159e-07	0.303053	0.18	0.534
hMG2	Lman2l	0.768237	2.47395e-05	0.302802	0.219	0.543
hMG2	Fiz1	0.00094491	3.04289e-08	0.30246	0.125	0.442
hMG2	Phf20	0.138964	4.47507e-06	0.302359	0.203	0.533
hMG2	Lpgat1	0.0112215	3.61366e-07	0.302171	0.195	0.557
hMG2	Nek7	1	0.00064731	0.301791	0.344	0.753
hMG2	Madd	0.712692	2.29508e-05	0.301662	0.156	0.419
hMG2	Sall3	1	0.00377176	0.301526	0.336	0.703
hMG2	Asap3	1	0.00657875	0.301082	0.133	0.283
hMG2	Setd3	1	0.00028466	0.300761	0.312	0.719
hMG2	Gna12	0.564038	1.81637e-05	0.300627	0.281	0.68
hMG2	Pkd2	1	0.000438216	0.300091	0.133	0.329
hMG2	Klhl20	1	0.00688546	0.300018	0.117	0.255
hMG2	Zyg11b	0.727684	2.34336e-05	0.299966	0.195	0.498
hMG2	Syt11	0.149089	4.80113e-06	0.299942	0.164	0.458
hMG2	Afg3l1	0.0606984	1.95467e-06	0.299818	0.211	0.565
hMG2	Cdkn2aip	1	0.000152655	0.299565	0.148	0.376
hMG2	Rb1	1	8.43634e-05	0.299146	0.164	0.414
hMG2	Gxylt1	0.157059	5.05777e-06	0.298572	0.188	0.504
hMG2	Abcb1b	1	0.000405642	0.298559	0.219	0.498
hMG2	Rnf31	0.0446061	1.43645e-06	0.298407	0.133	0.412
hMG2	Xpo7	0.0943722	3.03907e-06	0.298259	0.133	0.402
hMG2	Wdr13	0.513982	1.65518e-05	0.298205	0.109	0.334
hMG2	Tcerg1	0.104768	3.37386e-06	0.298197	0.234	0.613
hMG2	Banp	1	0.000293475	0.297797	0.148	0.366
hMG2	Ago2	1	6.10167e-05	0.297445	0.25	0.593
hMG2	Poldip3	0.0172571	5.55729e-07	0.297176	0.227	0.613
hMG2	Pogz	0.933484	3.0061e-05	0.297139	0.125	0.355
hMG2	Ncbp3	0.00207881	6.69441e-08	0.297103	0.18	0.54
hMG2	Htra2	0.033454	1.07732e-06	0.296696	0.211	0.577
hMG2	Ildr2	1	0.000341354	0.296419	0.164	0.391
hMG2	Baz1a	1	0.00543915	0.296145	0.336	0.696
hMG2	Lmbrd2	1	0.00216915	0.295879	0.141	0.317
hMG2	Mib1	1	3.70728e-05	0.295348	0.172	0.444
hMG2	Vcpip1	1	0.000164027	0.295049	0.203	0.483
hMG2	Rab3gap1	0.844703	2.7202e-05	0.294943	0.219	0.541
hMG2	Sowahc	0.0110915	3.5718e-07	0.294924	0.195	0.556
hMG2	Dcun1d2	1	0.000767753	0.294888	0.117	0.292
hMG2	Pmm2	0.00540745	1.74136e-07	0.294761	0.172	0.516
hMG2	Slc7a6os	0.315084	1.01466e-05	0.294724	0.133	0.386
hMG2	Itfg2	0.824983	2.65669e-05	0.2947	0.102	0.313
hMG2	Dctn4	1	0.000499769	0.294595	0.328	0.728
hMG2	Gem	0.0211267	6.80343e-07	0.294556	0.148	0.453
hMG2	Fam172a	1	4.34423e-05	0.294545	0.203	0.504
hMG2	Zc3hav1	0.45888	1.47773e-05	0.294226	0.289	0.699
hMG2	Mbtd1	0.383275	1.23426e-05	0.294118	0.203	0.523
hMG2	Tiparp	0.951401	3.0638e-05	0.29396	0.203	0.509
hMG2	Smo	0.0033901	1.09171e-07	0.293168	0.133	0.444
hMG2	Slx4ip	1	0.000415808	0.292812	0.125	0.315
hMG2	Dpp9	0.202237	6.51265e-06	0.292782	0.156	0.439
hMG2	Stat5b	1	0.00059517	0.292677	0.133	0.325
hMG2	Tmem63b	1	0.00187506	0.292644	0.109	0.264
hMG2	Trmt13	1	0.000146374	0.292179	0.141	0.362
hMG2	Efcab14	1	4.04246e-05	0.291741	0.25	0.6
hMG2	Tnks2	0.208252	6.70633e-06	0.291612	0.234	0.599
hMG2	Peli1	1	0.000382502	0.291604	0.336	0.76
hMG2	Hs2st1	1	7.87979e-05	0.291177	0.211	0.512
hMG2	Slamf6	0.000202754	6.52929e-09	0.291003	0.172	0.552
hMG2	Dstyk	1	0.00169348	0.290948	0.133	0.306
hMG2	Fhod1	0.000736795	2.3727e-08	0.290747	0.148	0.494
hMG2	Rasa1	0.000968902	3.12016e-08	0.290223	0.195	0.588
hMG2	Snx13	1	4.49023e-05	0.290149	0.18	0.457
hMG2	Spg7	0.350867	1.1299e-05	0.290124	0.188	0.49
hMG2	Map2k3	0.107231	3.45317e-06	0.290073	0.227	0.593
hMG2	Csnk2a1	0.138175	4.44965e-06	0.290073	0.219	0.574
hMG2	Sh2d3c	1	0.000450314	0.289933	0.164	0.388
hMG2	Elk4	0.0500939	1.61317e-06	0.289628	0.172	0.488
hMG2	Slc30a5	0.0184428	5.93913e-07	0.289588	0.195	0.551
hMG2	Neurl3	0.000623968	2.00937e-08	0.289559	0.156	0.511
hMG2	Hmgcr	1	0.000131286	0.289525	0.164	0.409
hMG2	Arl4c	1	0.000736916	0.28944	0.352	0.772
hMG2	Vezt	1	0.000121001	0.289366	0.109	0.306
hMG2	Gm12216	1	0.00320445	0.289232	0.109	0.254
hMG2	Usp48	0.235019	7.5683e-06	0.288789	0.203	0.527
hMG2	Mark2	1	0.000129859	0.28869	0.273	0.637
hMG2	Cops8	0.0369748	1.1907e-06	0.288518	0.266	0.695
hMG2	Ipo8	1	0.000297262	0.288119	0.148	0.365
hMG2	Cep83	1	6.13139e-05	0.287926	0.164	0.42
hMG2	Gmeb1	0.00702682	2.26285e-07	0.287719	0.133	0.435
hMG2	Sgk3	0.247491	7.96994e-06	0.287535	0.18	0.481
hMG2	Telo2	1	0.000334965	0.2874	0.164	0.392
hMG2	Tnpo1	0.118395	3.81269e-06	0.287313	0.227	0.591
hMG2	Preb	0.00757087	2.43805e-07	0.287292	0.195	0.563
hMG2	Stag2	1	0.000135072	0.287226	0.211	0.501
hMG2	Pbx3	0.657026	2.11582e-05	0.287147	0.133	0.376
hMG2	Zfp512	1	0.000754678	0.287042	0.164	0.379
hMG2	Lpp	1	5.6326e-05	0.286925	0.25	0.602
hMG2	Glrp1	0.0993783	3.20028e-06	0.286835	0.164	0.463
hMG2	Ddx55	1	3.67725e-05	0.28663	0.109	0.323
hMG2	Prrc2b	0.00489284	1.57564e-07	0.286539	0.164	0.499
hMG2	Inppl1	0.00653113	2.10322e-07	0.286288	0.117	0.405
hMG2	Smc6	0.0151481	4.87814e-07	0.28545	0.258	0.673
hMG2	Ptk2b	1	0.000141141	0.285049	0.273	0.635
hMG2	Trim30d	0.140827	4.53505e-06	0.285009	0.25	0.639
hMG2	Ppp1r9a	1	4.27628e-05	0.285002	0.188	0.472
hMG2	2010315B03Rik	1	0.00163655	0.285001	0.117	0.28
hMG2	Spata5	1	0.00261018	0.284985	0.148	0.327
hMG2	Cbx1	0.67805	2.18353e-05	0.28482	0.266	0.648
hMG2	Tspyl1	1	4.79154e-05	0.284572	0.164	0.425
hMG2	Nfatc2	0.234254	7.54369e-06	0.284234	0.164	0.452
hMG2	Gpatch2	1	0.00133614	0.283855	0.141	0.326
hMG2	Hmg20a	1	0.000418373	0.28374	0.164	0.389
hMG2	Psme4	0.0768707	2.47547e-06	0.283718	0.18	0.499
hMG2	Capn15	1	0.00107845	0.283697	0.148	0.343
hMG2	A930007I19Rik	1	9.17232e-05	0.283626	0.18	0.436
hMG2	Ppp1r12a	1	6.10443e-05	0.283491	0.312	0.725
hMG2	Apobec1	1	0.00126222	0.283485	0.336	0.731
hMG2	Dennd5a	0.00280827	9.04349e-08	0.282766	0.195	0.574
hMG2	Rfc1	0.0284146	9.15036e-07	0.282676	0.203	0.561
hMG2	Naip6	1	0.000133161	0.282462	0.102	0.291
hMG2	Mllt3	1	0.000121522	0.282351	0.109	0.306
hMG2	Card9	0.511827	1.64824e-05	0.282194	0.172	0.455
hMG2	Pibf1	1	0.000510493	0.282015	0.156	0.371
hMG2	Adora1	0.0991977	3.19446e-06	0.281867	0.219	0.573
hMG2	Tmem144	0.842547	2.71326e-05	0.2812	0.125	0.357
hMG2	Mdm2	0.000876749	2.8234e-08	0.280437	0.195	0.587
hMG2	Pkp4	0.335488	1.08037e-05	0.280414	0.148	0.416
hMG2	Sec61a2	0.0945788	3.04572e-06	0.280371	0.117	0.372
hMG2	Ndel1	0.0146774	4.72657e-07	0.280149	0.203	0.572
hMG2	Tmem230	0.00457492	1.47326e-07	0.280112	0.188	0.549
hMG2	Atg2a	0.343108	1.10491e-05	0.280027	0.164	0.444
hMG2	Gm20342	1	0.000175971	0.279834	0.086	0.258
hMG2	Mob3c	0.000656408	2.11383e-08	0.279746	0.18	0.556
hMG2	Sirt3	1	0.000193563	0.279731	0.109	0.299
hMG2	Neurl4	1	0.000763106	0.279695	0.125	0.306
hMG2	Qrich1	0.000921694	2.96813e-08	0.279108	0.172	0.539
hMG2	Psme2b	0.0138125	4.44804e-07	0.278948	0.164	0.488
hMG2	Ppp2r5a	0.258643	8.32908e-06	0.278907	0.203	0.53
hMG2	Inpp4b	1	0.00227331	0.278153	0.156	0.343
hMG2	Myo1f	1	4.27841e-05	0.277972	0.32	0.753
hMG2	Trps1	1	0.000324542	0.277887	0.148	0.363
hMG2	Kdm2b	0.106758	3.43792e-06	0.277685	0.211	0.561
hMG2	Nacc2	0.102406	3.29779e-06	0.277674	0.141	0.417
hMG2	Gab2	0.20956	6.74846e-06	0.277611	0.156	0.438
hMG2	Arhgef6	0.00045906	1.47831e-08	0.277479	0.195	0.593
hMG2	Mbtps1	0.295578	9.51849e-06	0.277271	0.195	0.512
hMG2	Spidr	1	0.00064422	0.27713	0.125	0.309
hMG2	Osbpl8	1	7.15091e-05	0.276915	0.156	0.402
hMG2	Taz	0.0126756	4.08191e-07	0.276826	0.211	0.59
hMG2	Glyr1	1	0.000124048	0.276762	0.289	0.678
hMG2	Slc16a6	1	0.00077506	0.276752	0.336	0.734
hMG2	Rasgef1b	0.147677	4.75564e-06	0.276651	0.094	0.322
hMG2	Heatr1	0.286088	9.2129e-06	0.276518	0.164	0.449
hMG2	Snapc3	1	0.00122322	0.275625	0.125	0.298
hMG2	Pde4dip	0.224642	7.23414e-06	0.27548	0.133	0.39
hMG2	Copa	0.197414	6.35732e-06	0.275441	0.305	0.762
hMG2	Usp16	1	4.05732e-05	0.275085	0.25	0.599
hMG2	Dhx33	1	0.0029486	0.27507	0.133	0.297
hMG2	Il6ra	1	9.50112e-05	0.274986	0.305	0.707
hMG2	Dennd4b	0.216051	6.95749e-06	0.274889	0.156	0.437
hMG2	Sirt1	1	0.00099352	0.274885	0.125	0.301
hMG2	Ccdc84	1	0.0004618	0.274759	0.133	0.329
hMG2	Mb21d1	1	0.000299826	0.27468	0.273	0.615
hMG2	Terf1	1	0.000316839	0.274447	0.156	0.377
hMG2	Cebpg	0.0953126	3.06935e-06	0.27425	0.25	0.643
hMG2	Nmd3	0.00767018	2.47003e-07	0.273921	0.195	0.561
hMG2	Ccdc93	0.129548	4.17182e-06	0.273889	0.188	0.508
hMG2	Aldh16a1	0.303921	9.78717e-06	0.273669	0.156	0.432
hMG2	Opa1	1	9.66578e-05	0.273073	0.18	0.443
hMG2	Xpo4	1	0.0014953	0.272861	0.172	0.381
hMG2	Ehmt1	0.000250885	8.07924e-09	0.272692	0.141	0.49
hMG2	Ipo9	1	0.000131826	0.272378	0.148	0.379
hMG2	Rint1	1	0.00740805	0.272156	0.117	0.254
hMG2	Cabin1	0.537794	1.73186e-05	0.272113	0.25	0.62
hMG2	Ric8a	0.792434	2.55187e-05	0.272008	0.172	0.449
hMG2	Orc3	0.94086	3.02985e-05	0.271705	0.133	0.37
hMG2	Ptp4a1	0.0935577	3.01284e-06	0.271689	0.258	0.655
hMG2	Iqgap1	1	0.00105876	0.271462	0.242	0.51
hMG2	Tada3	0.00366957	1.18171e-07	0.271452	0.141	0.459
hMG2	Ints13	1	7.17863e-05	0.271358	0.141	0.373
hMG2	Egr3	0.135135	4.35175e-06	0.270878	0.102	0.335
hMG2	Taf1	0.0213264	6.86773e-07	0.27078	0.141	0.437
hMG2	Esrra	0.0604597	1.94698e-06	0.270638	0.125	0.393
hMG2	Map7d1	1	0.000102391	0.270631	0.25	0.59
hMG2	Dbf4	1	0.000100668	0.270596	0.18	0.441
hMG2	Gpbp1l1	0.244663	7.87888e-06	0.270311	0.148	0.419
hMG2	B230219D22Rik	0.00874443	2.81597e-07	0.270233	0.211	0.591
hMG2	Ppp1r10	1	9.49366e-05	0.269877	0.266	0.613
hMG2	R3hdm2	1	0.000121678	0.269823	0.242	0.564
hMG2	Glg1	1	0.00438374	0.269691	0.32	0.673
hMG2	Otud7b	1	0.000486324	0.269606	0.156	0.372
hMG2	Asl	0.268424	8.64405e-06	0.269259	0.172	0.465
hMG2	Atf2	0.642714	2.06973e-05	0.26899	0.156	0.419
hMG2	Dlg4	1	0.00119046	0.268948	0.109	0.27
hMG2	Miip	0.853654	2.74902e-05	0.268947	0.156	0.417
[truncated: 1,523 more rows]
